# Supplementary material for: Chelating palladium complexes containing pyridine/pyrimidine hydroxyalkyl di-functionalized N-heterocyclic carbenes: synthesis, structure, and catalytic activity towards C–H activation
Source: Royal Society of Chemistry journal article supplement (doi:10.1039/c5ra21183b), 2015-01-01

NMR spectra of compounds **1-3**:

$^1\text{H}$  NMR spectrum of **1a**:

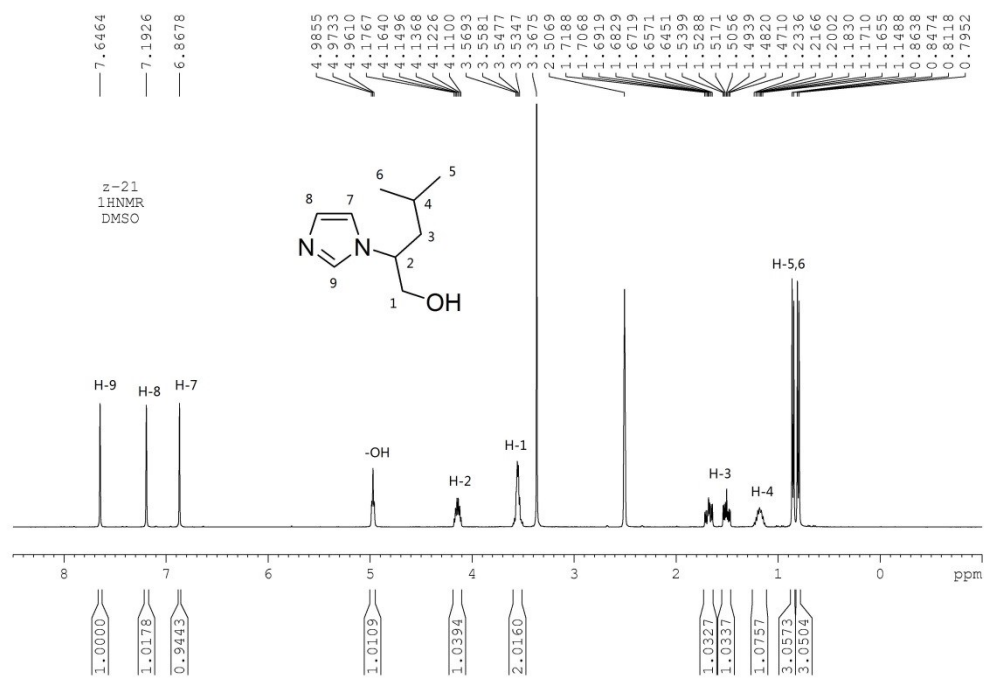

$^{13}\text{C}$  NMR spectrum of **1a**:

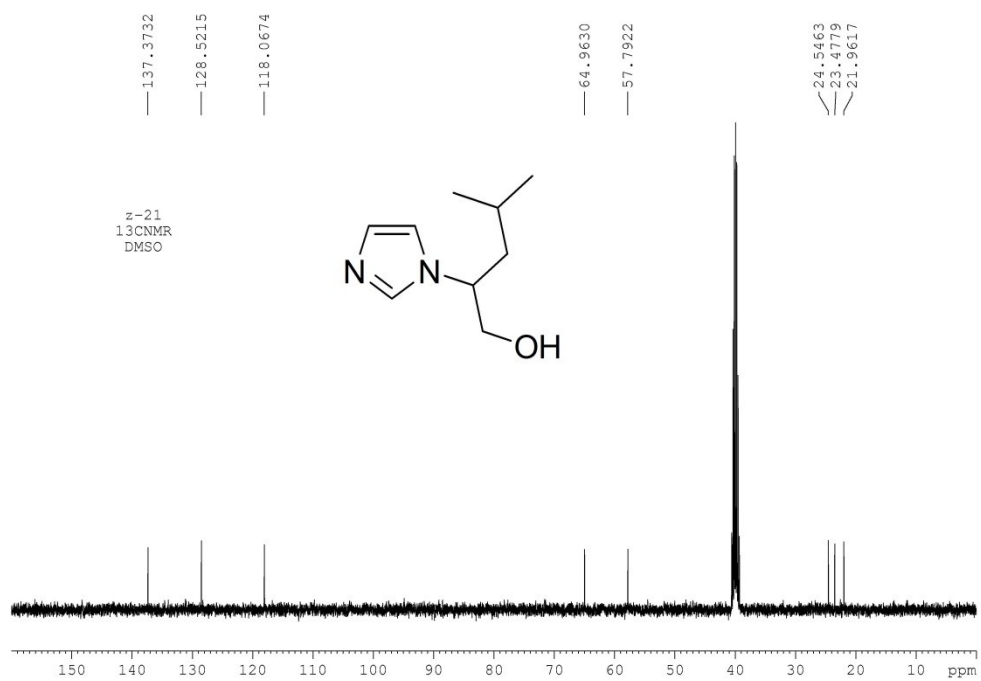

### <sup>1</sup>H NMR spectrum of **1b**:

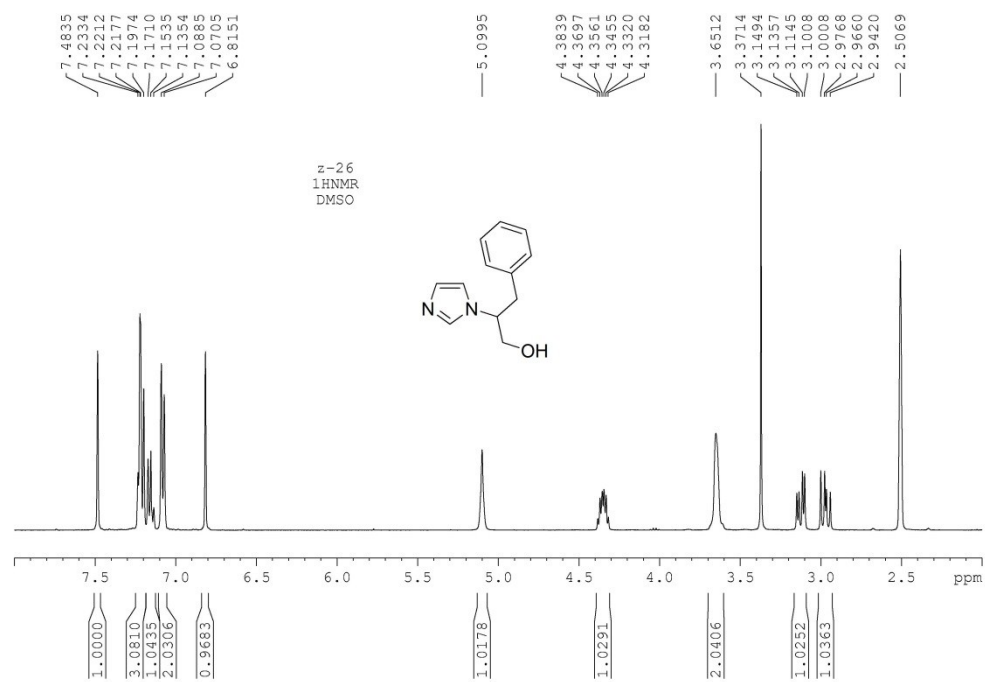

### <sup>13</sup>C NMR spectrum of **1b**:

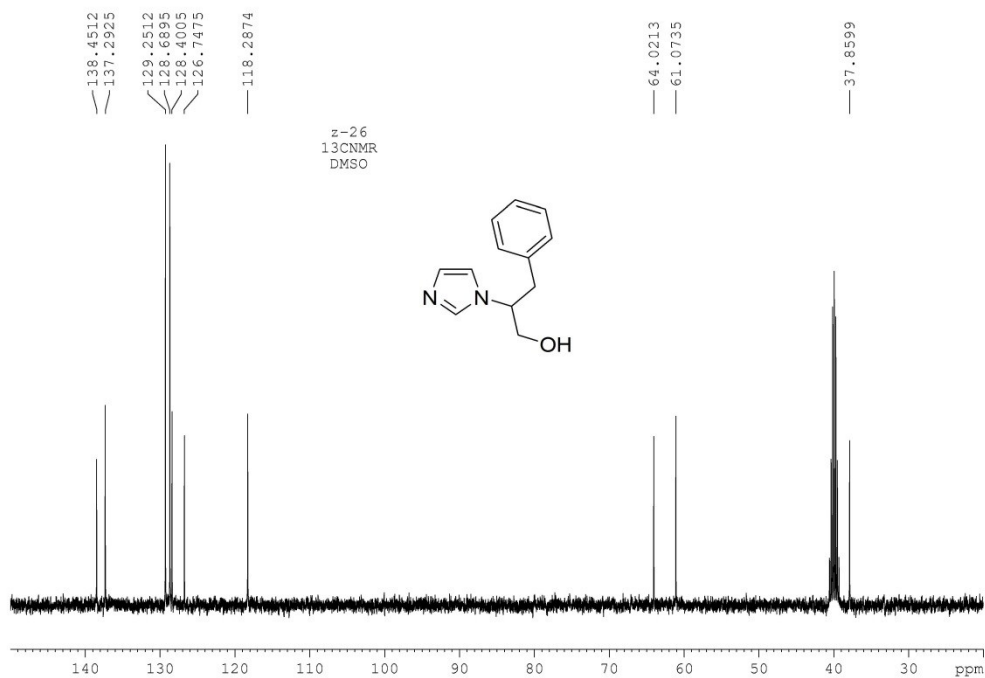



### $^1\text{H}$ NMR spectrum of **2b**:

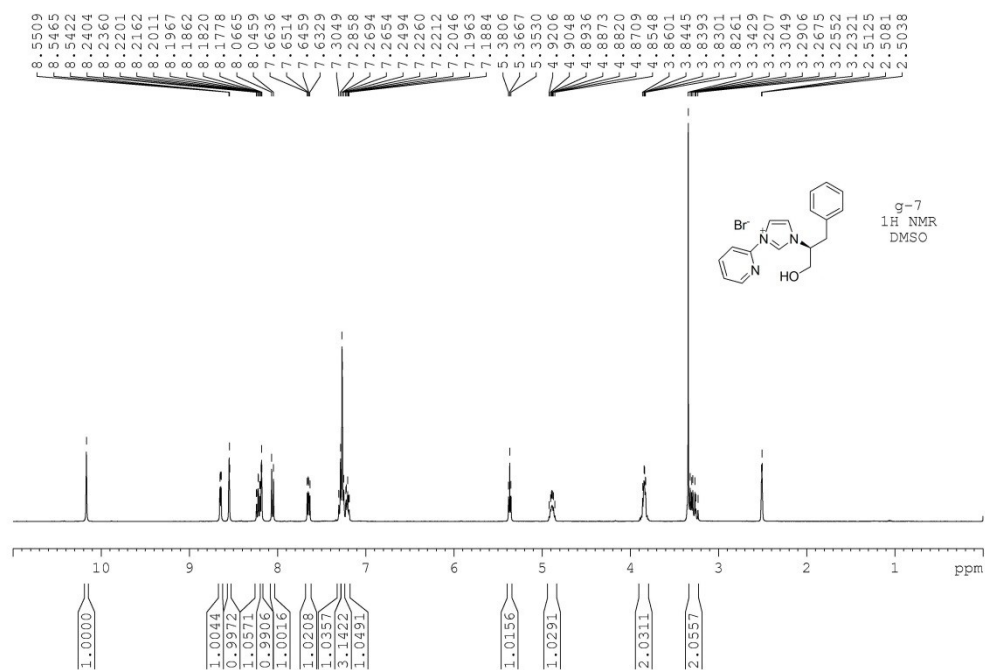

### $^{13}\text{C}$ NMR spectrum of **2b**:

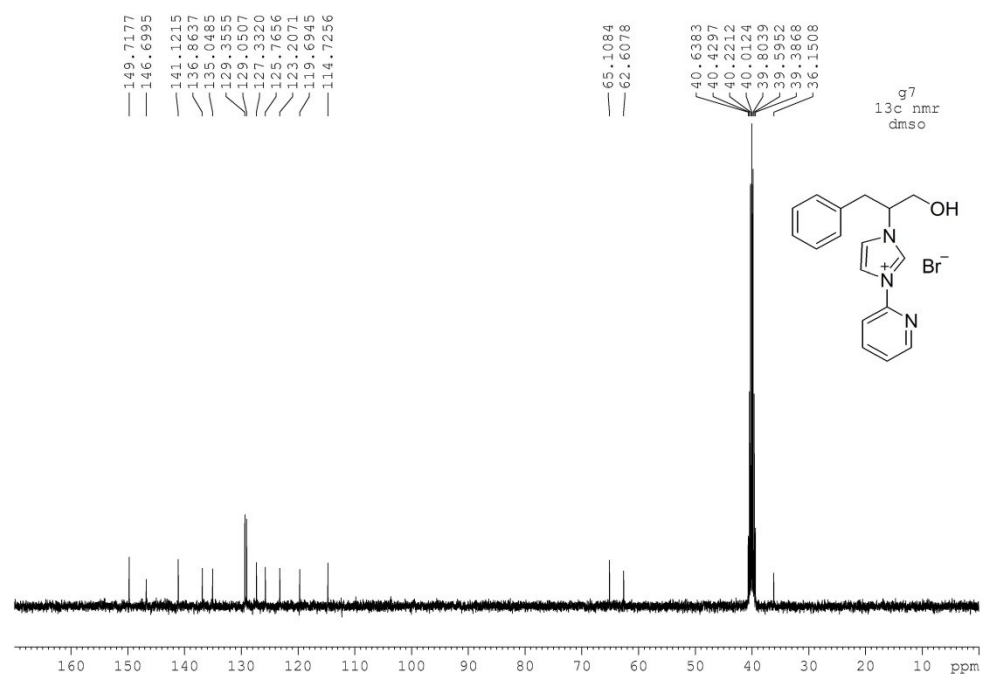



$^1\text{H}$  NMR spectrum of **2d**:

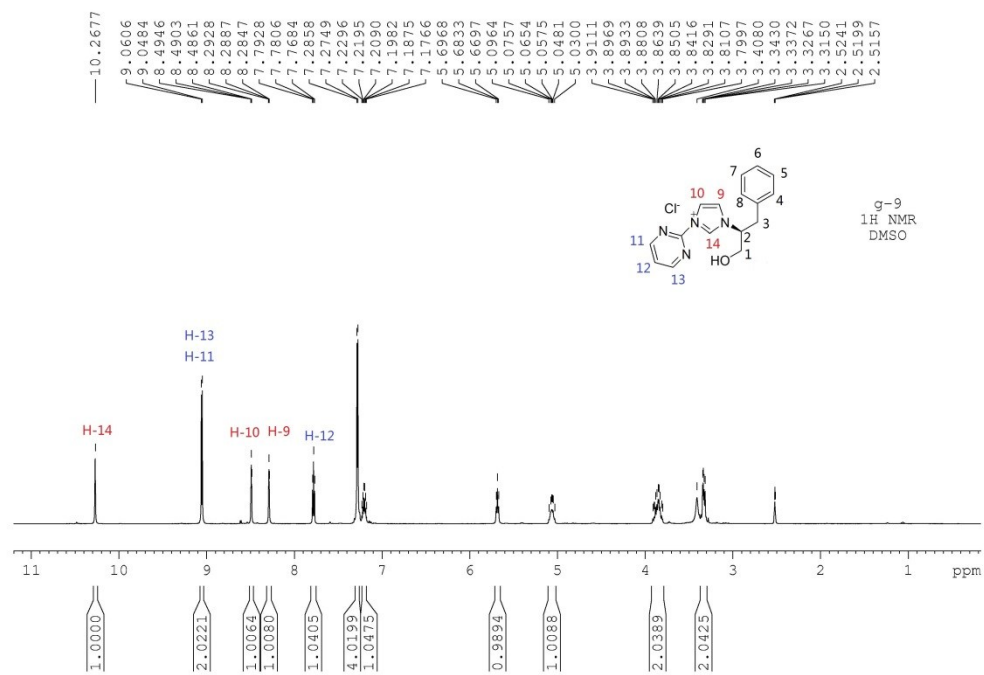

$^{13}\text{C}$  NMR spectrum of **2d**:

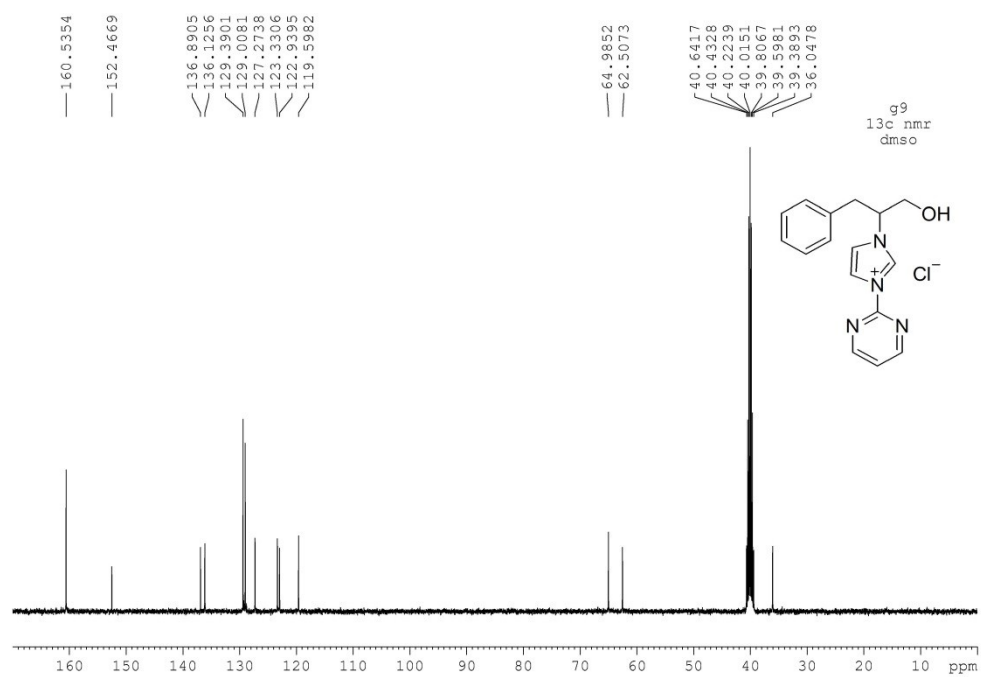

### <sup>1</sup>H NMR spectrum of **3a**:

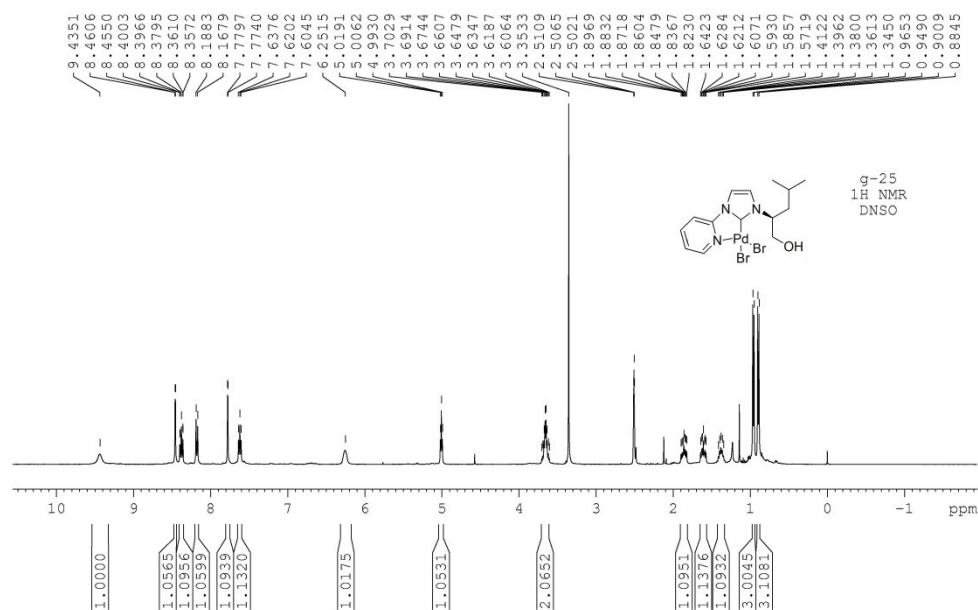

### <sup>13</sup>C NMR spectrum of **3a**:

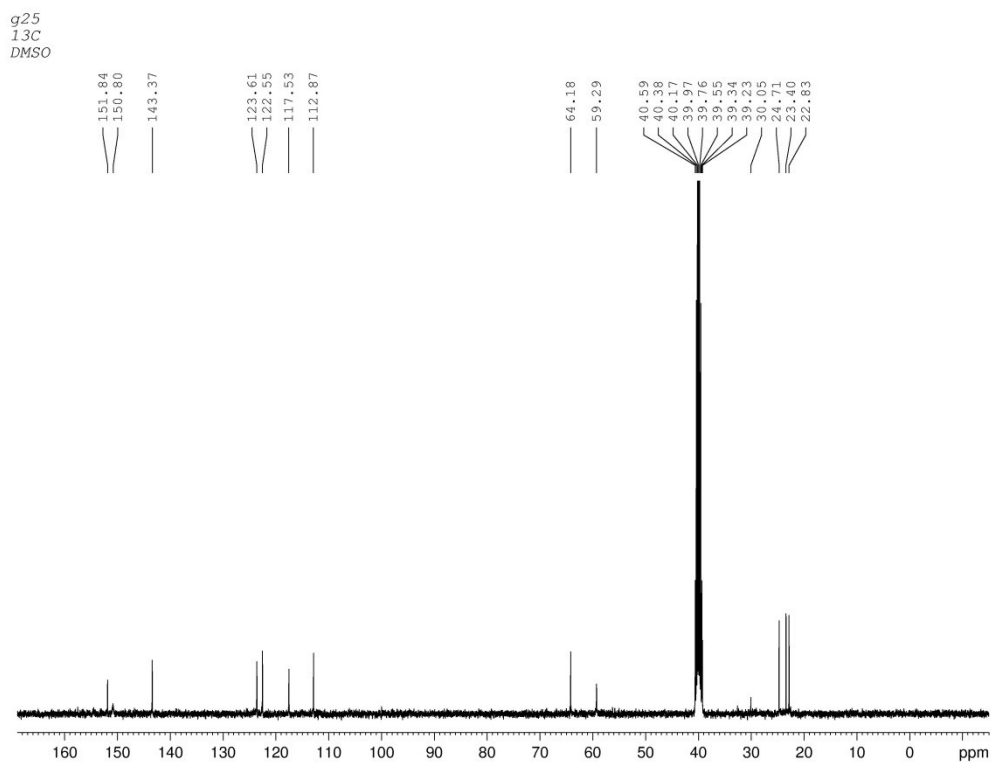

<sup>1</sup>H NMR spectrum of **3b**:

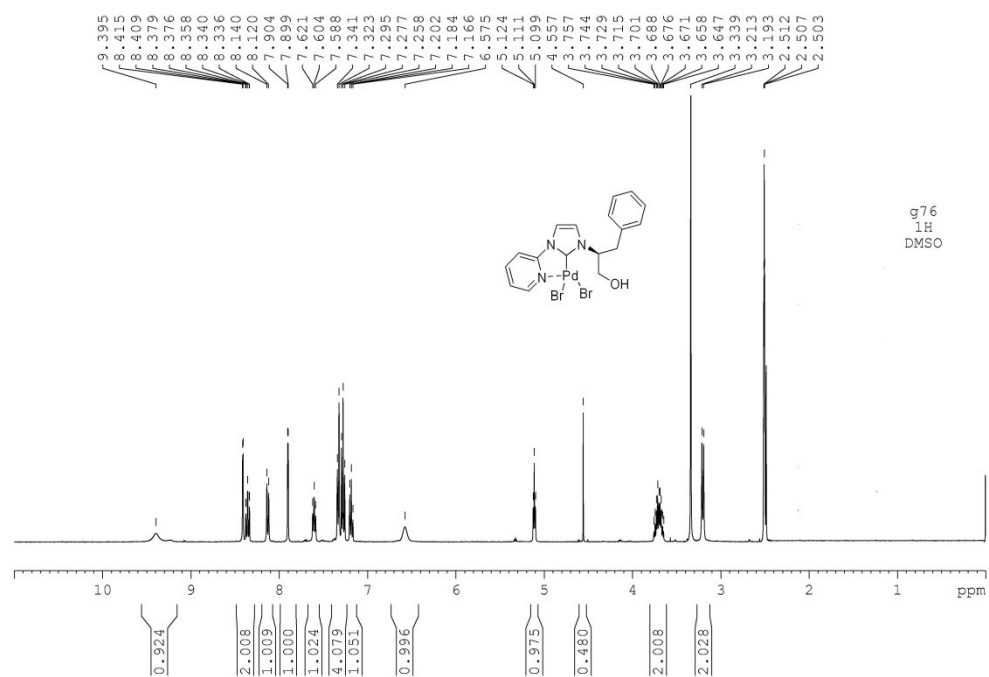

<sup>13</sup>C NMR spectrum of **3b**:

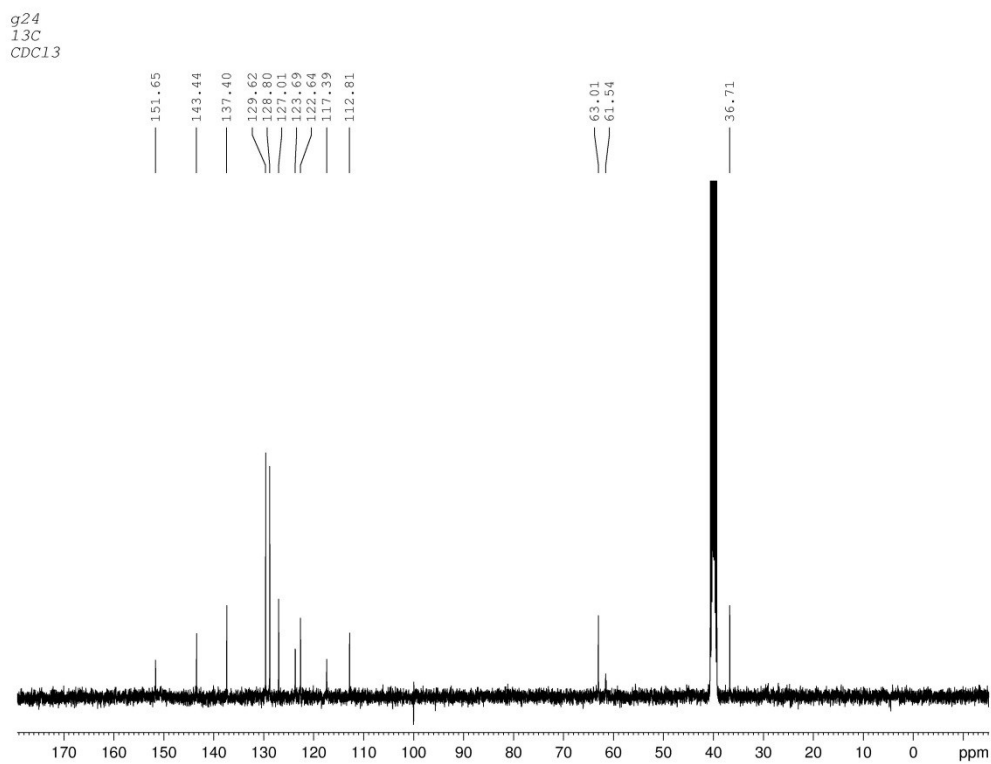



### <sup>1</sup>H NMR spectrum of **3c**:

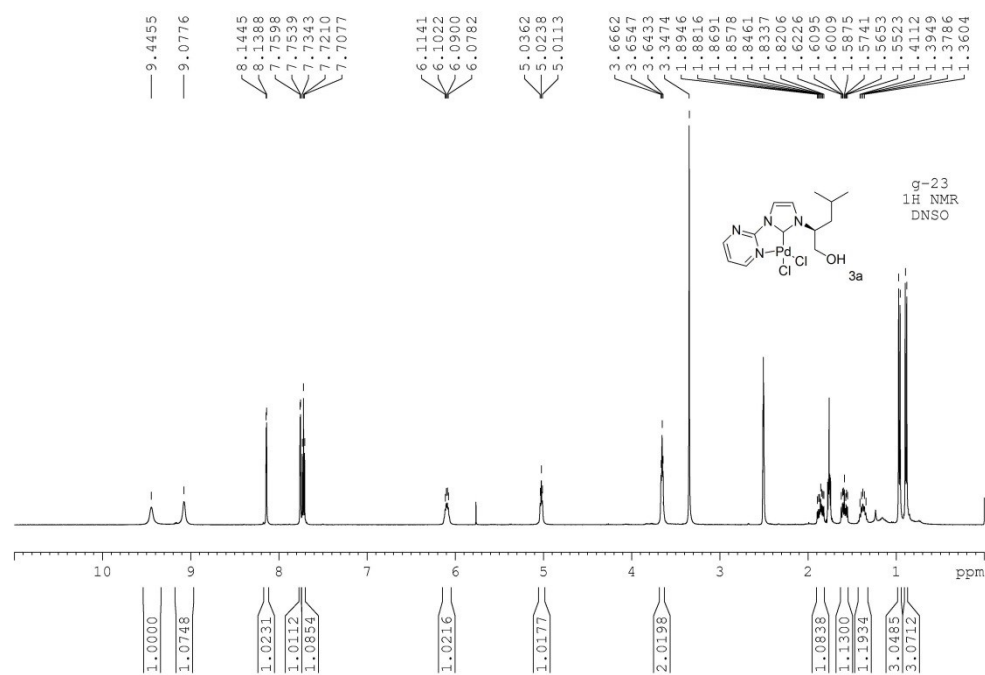

### <sup>13</sup>C NMR spectrum of **3c**:

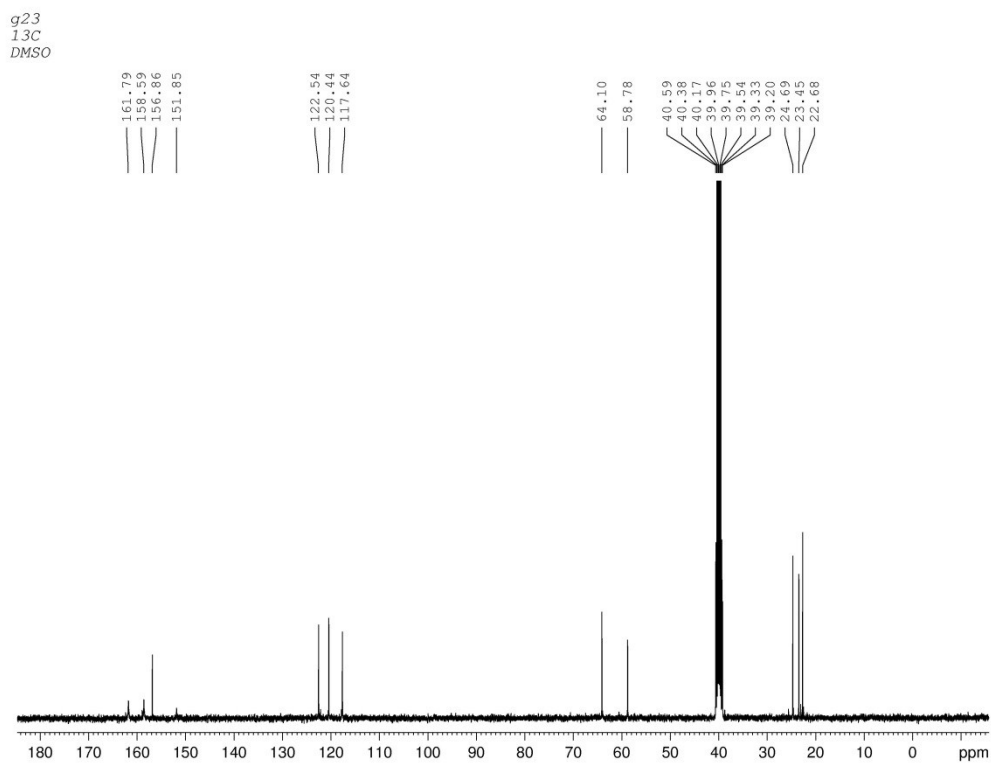

<sup>1</sup>H NMR spectrum of **3d**:

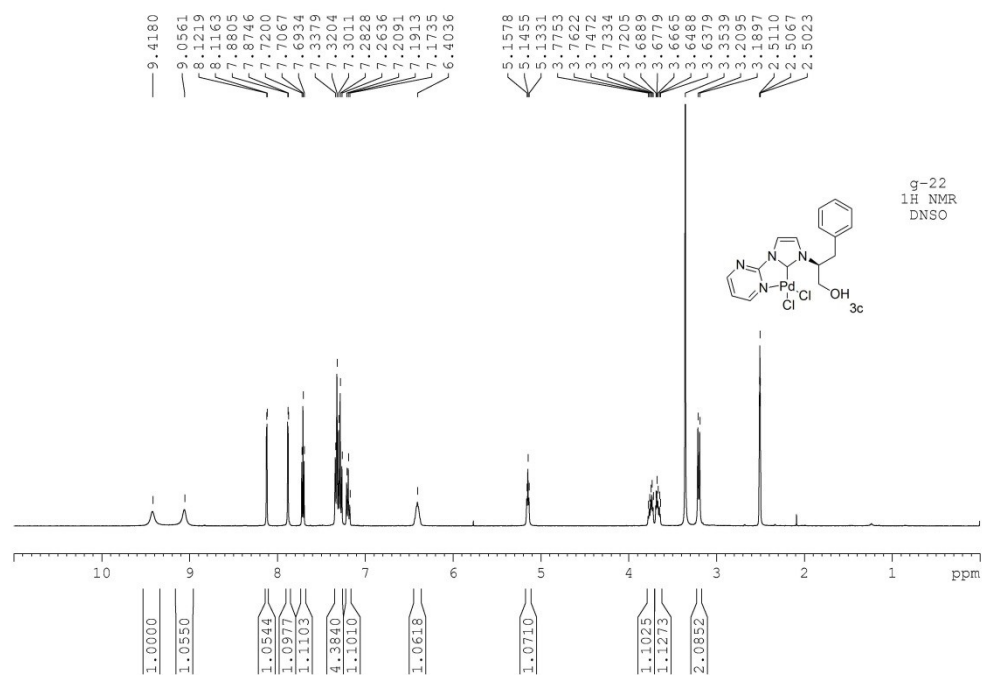

<sup>13</sup>C NMR spectrum of **3d**:

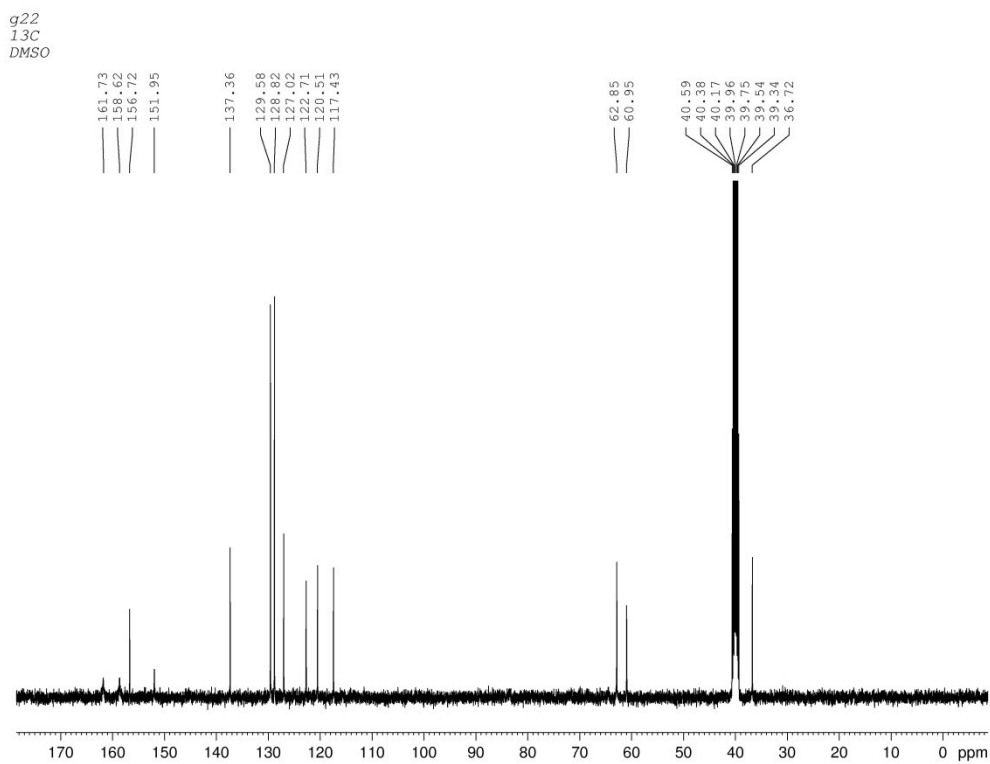

Supplement: c5ra21183b1.pdf [file c5ra21183b1.pdf]
