# Supplementary material for: Chelating palladium complexes containing pyridine/pyrimidine hydroxyalkyl di-functionalized N-heterocyclic carbenes: synthesis, structure, and catalytic activity towards C–H activation
Source: Royal Society of Chemistry journal article supplement (doi:10.1039/c5ra21183b), 2015-01-01

## NMR Spectra of Compounds 4

$^1\text{H}$  NMR spectrum of **4a**:

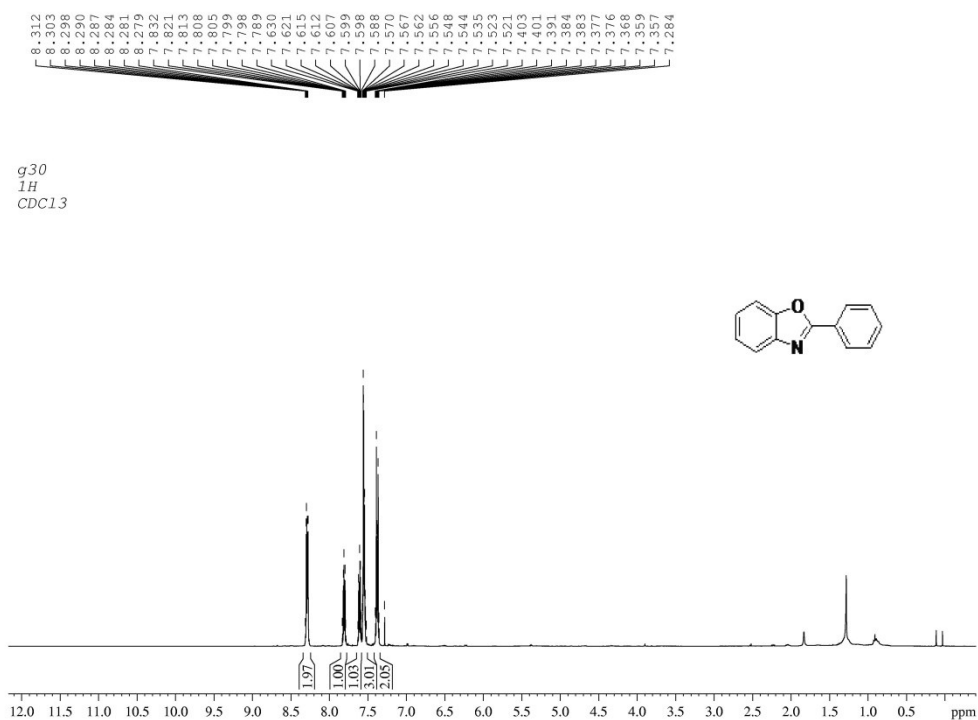

$^{13}\text{C}$  NMR spectrum of **4a**:

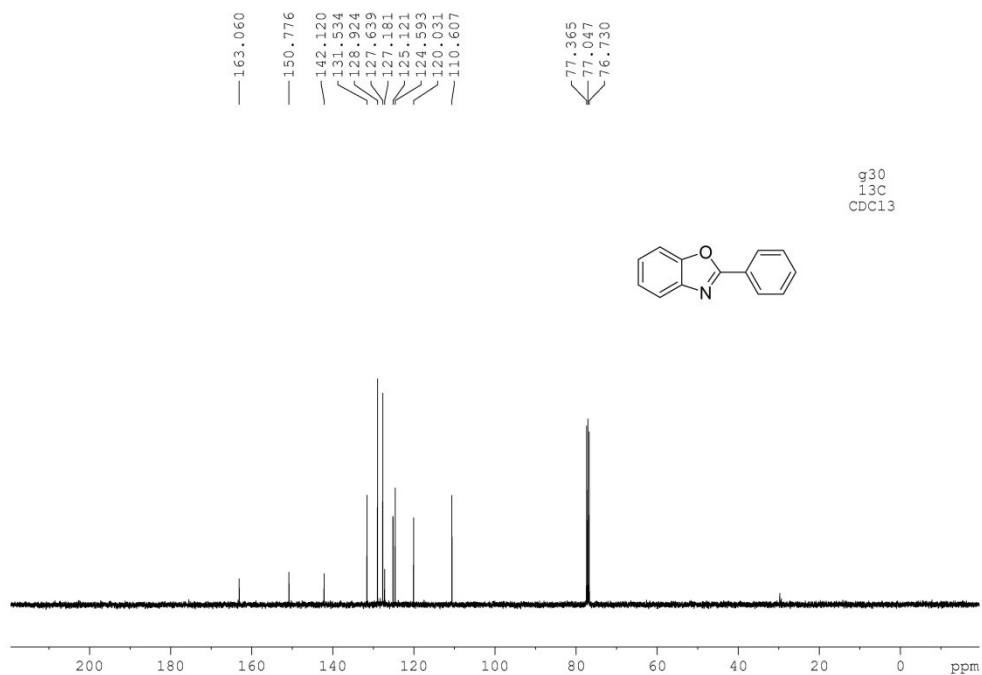

<sup>1</sup>H NMR spectrum of **4b**:

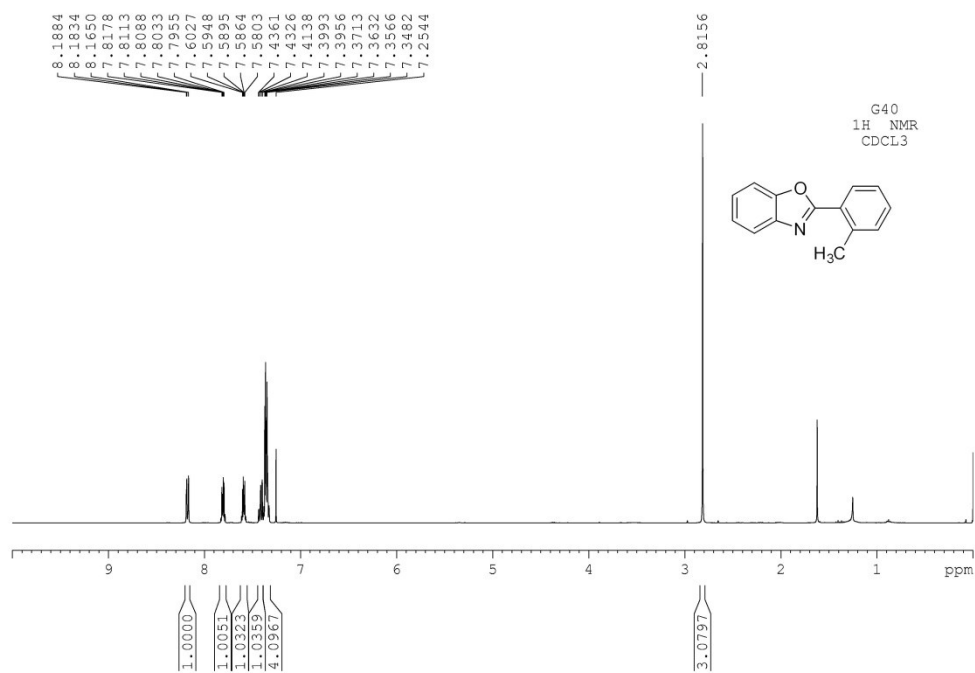

<sup>13</sup>C NMR spectrum of **4b**:

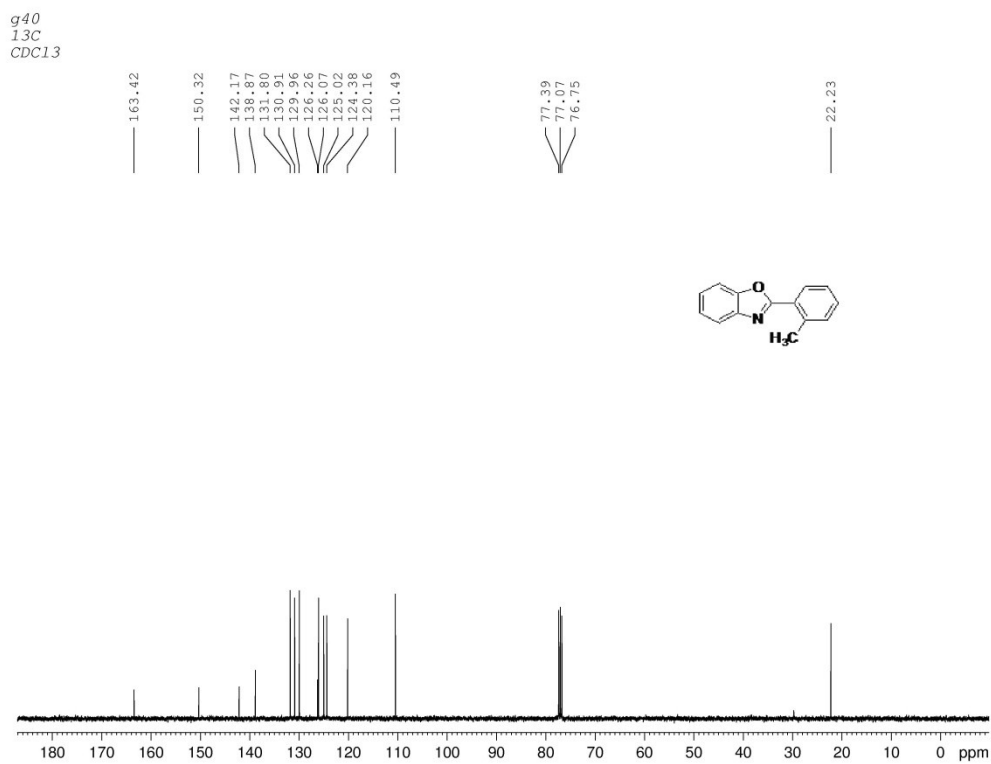

### <sup>1</sup>H NMR spectrum of **4c**:

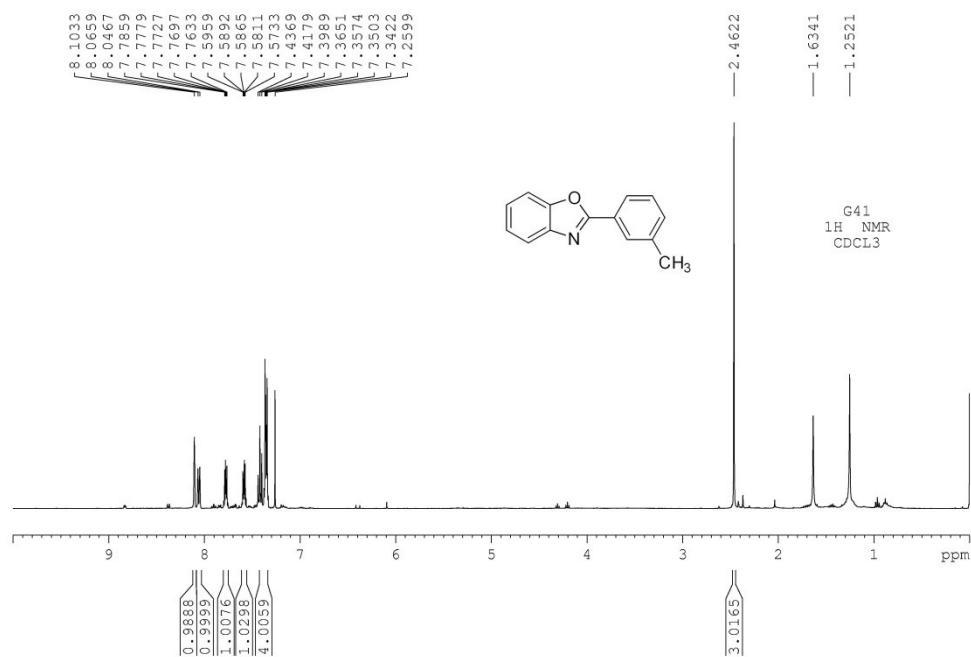

### <sup>13</sup>C NMR spectrum of **4c**:

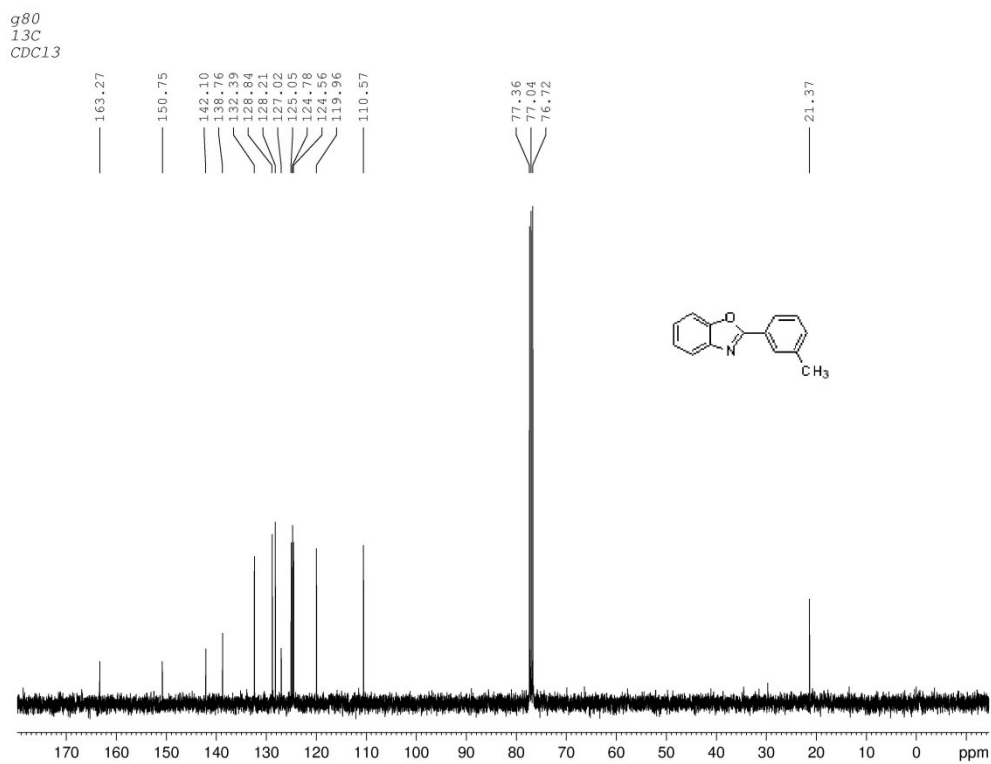

<sup>1</sup>H NMR spectrum of **4d**:

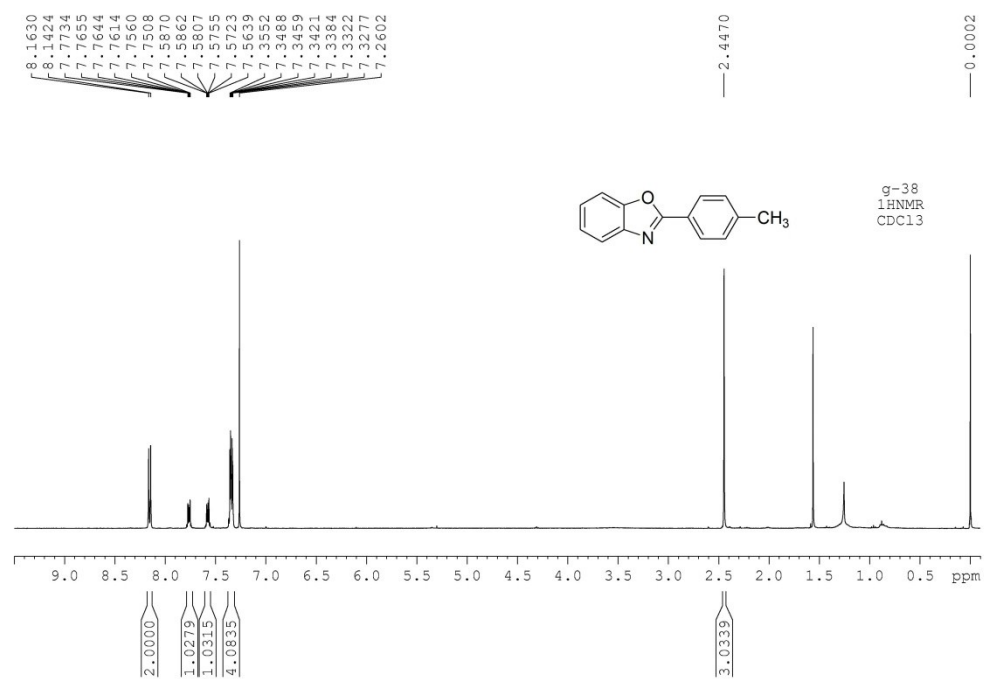

<sup>13</sup>C NMR spectrum of **4d**:

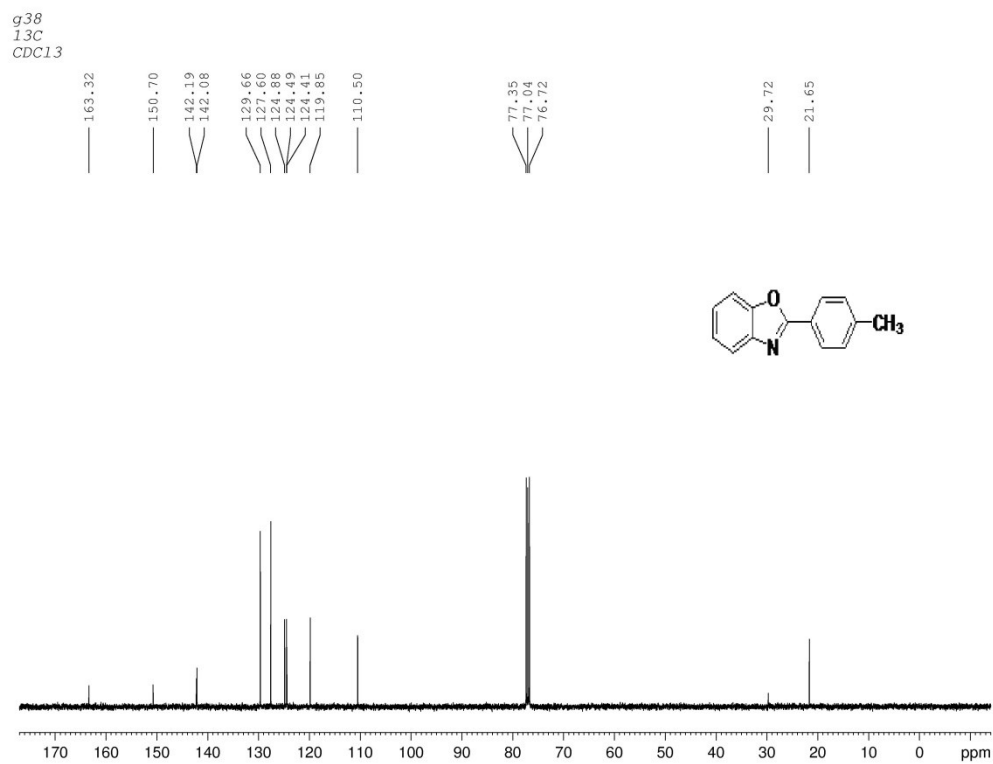

<sup>1</sup>H NMR spectrum of **4e**:

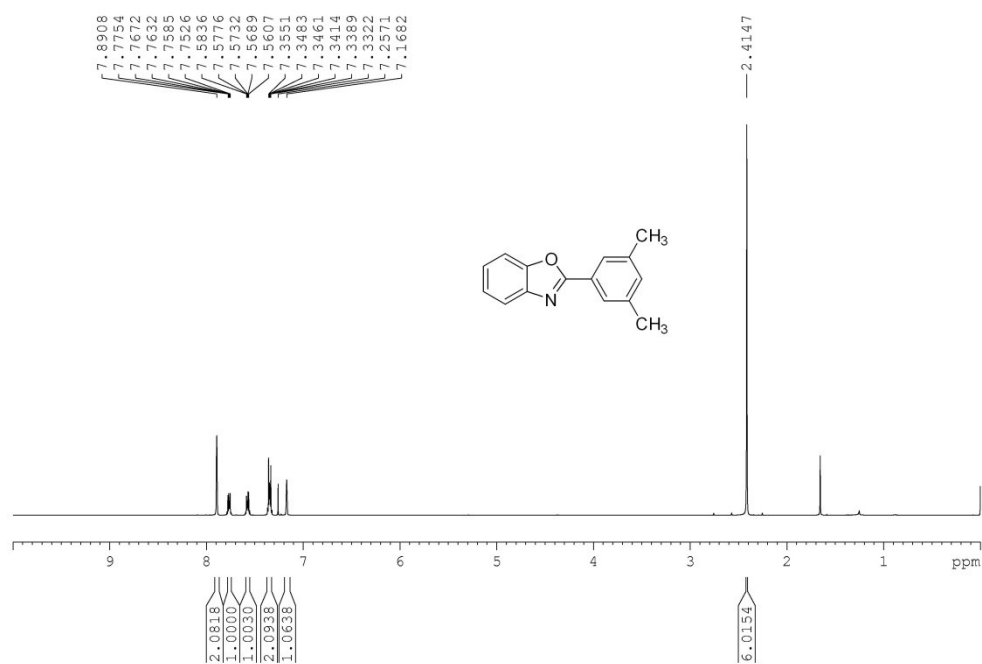

<sup>13</sup>C NMR spectrum of **4e**:

g42

13C  
CDCl<sub>3</sub>

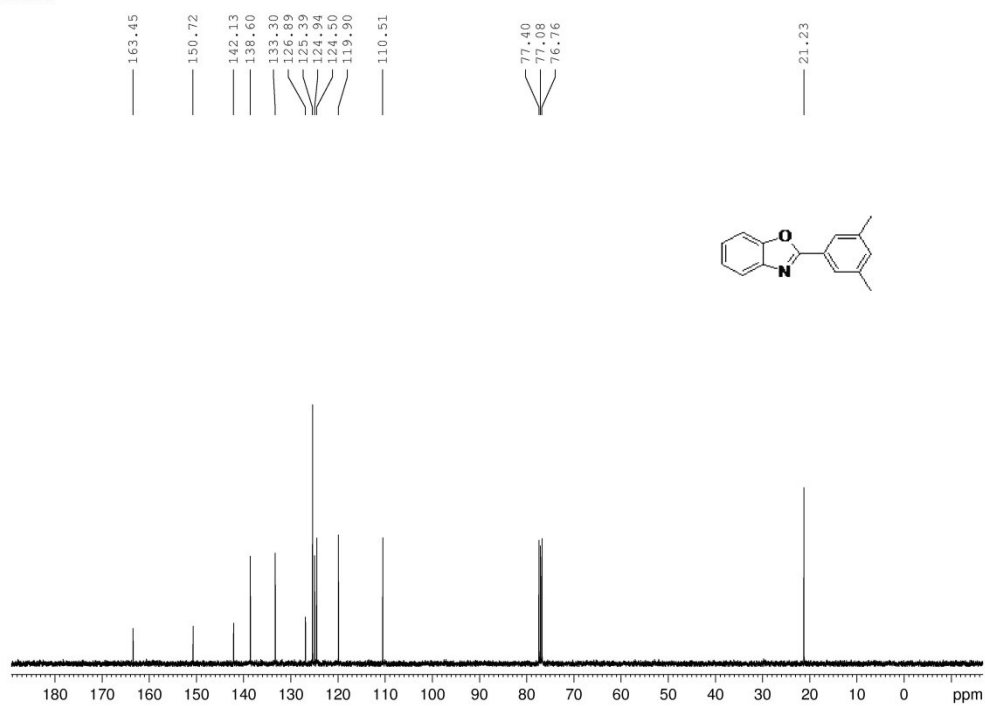

<sup>1</sup>H NMR spectrum of **4f**:

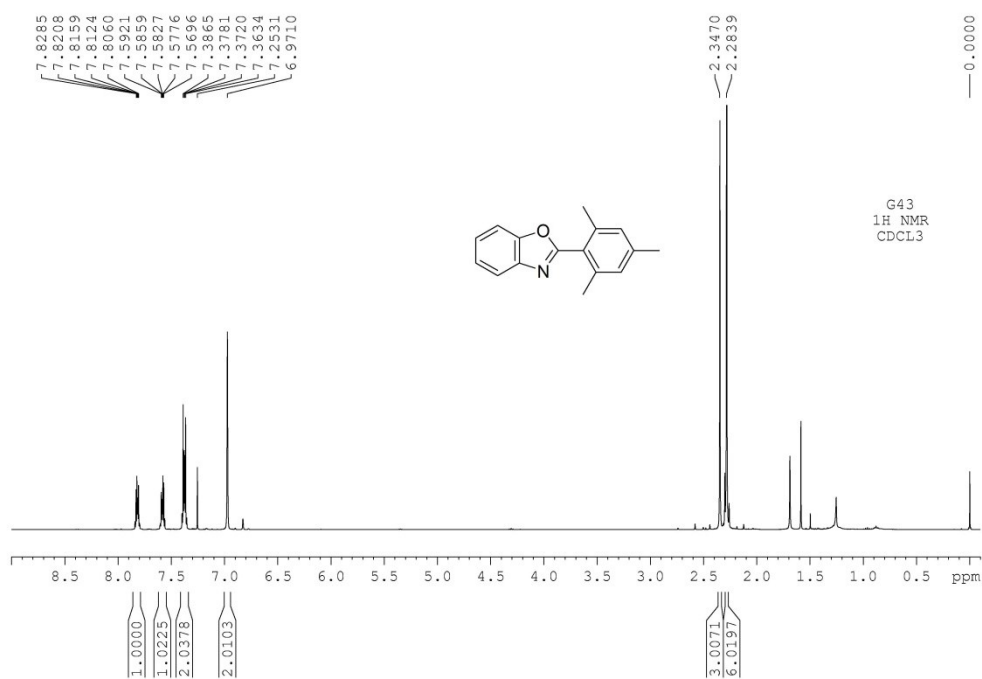

<sup>13</sup>C NMR spectrum of **4f**:

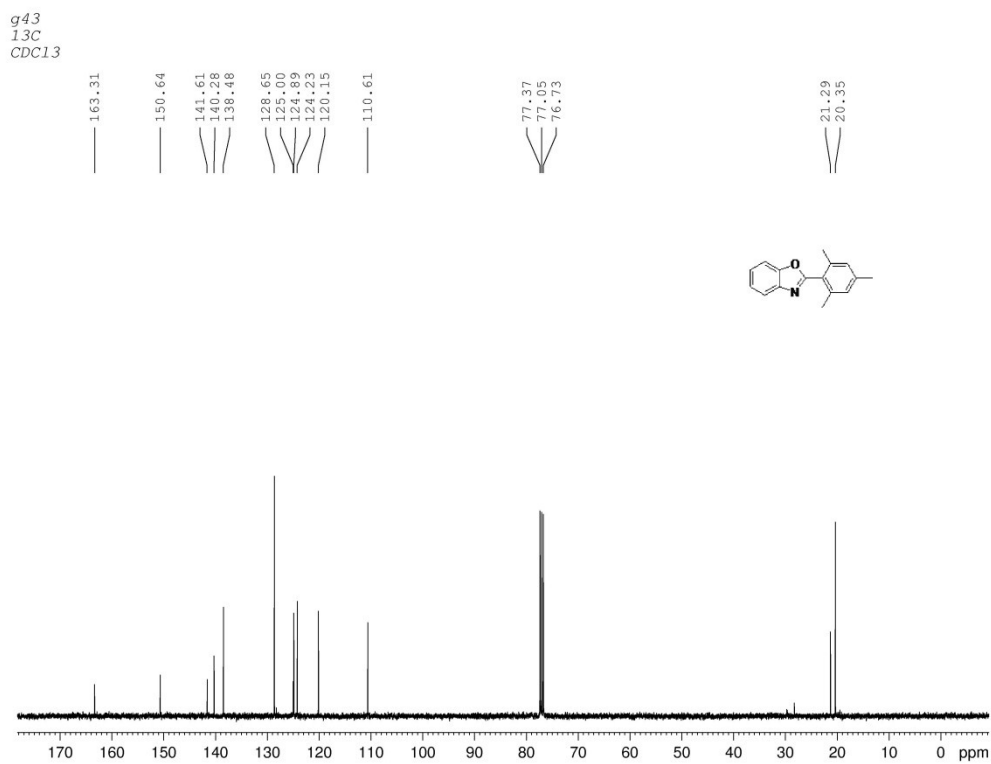

<sup>1</sup>H NMR spectrum of **4g**:

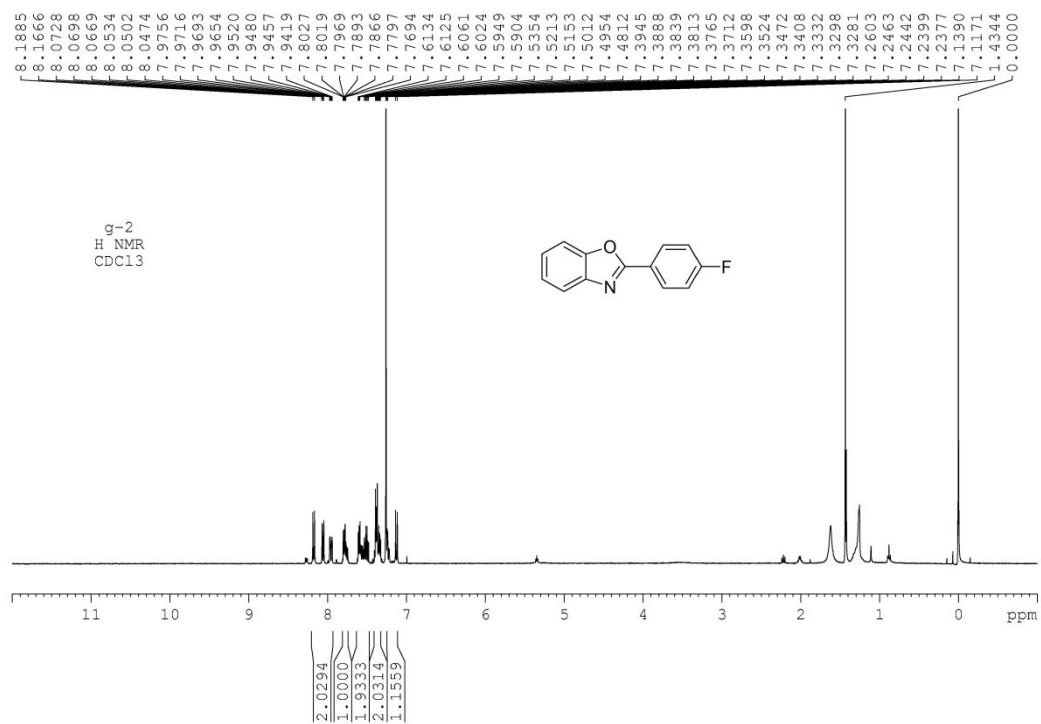

<sup>1</sup>H NMR spectrum of **4h**:

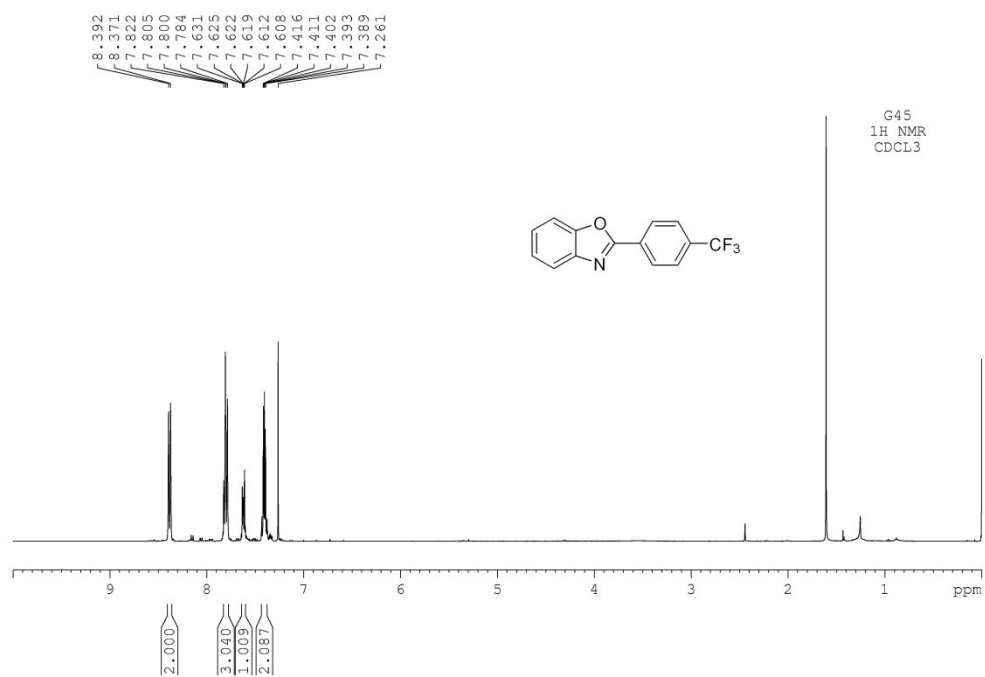

<sup>13</sup>C NMR spectrum of **4h**:

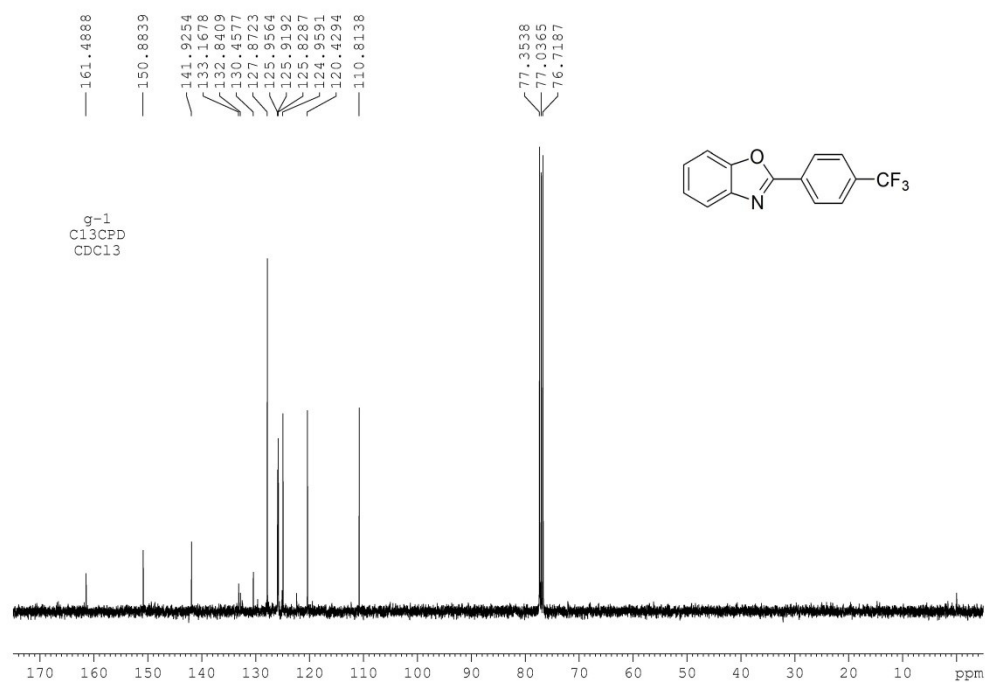



<sup>1</sup>H NMR spectrum of **4i**:

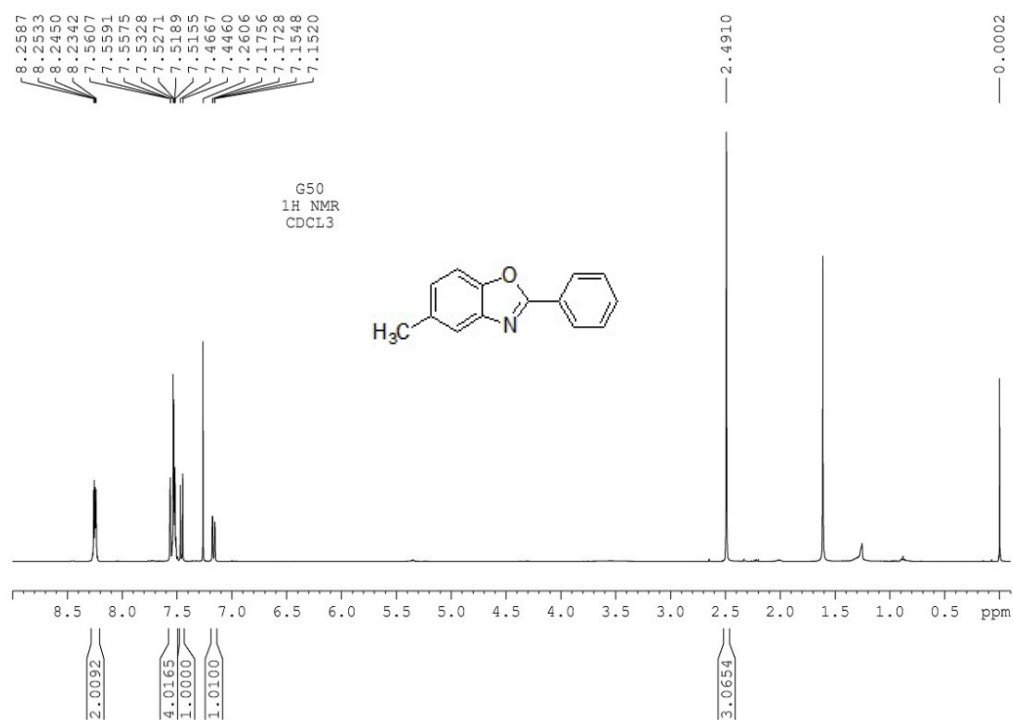

<sup>13</sup>C NMR spectrum of **4i**:

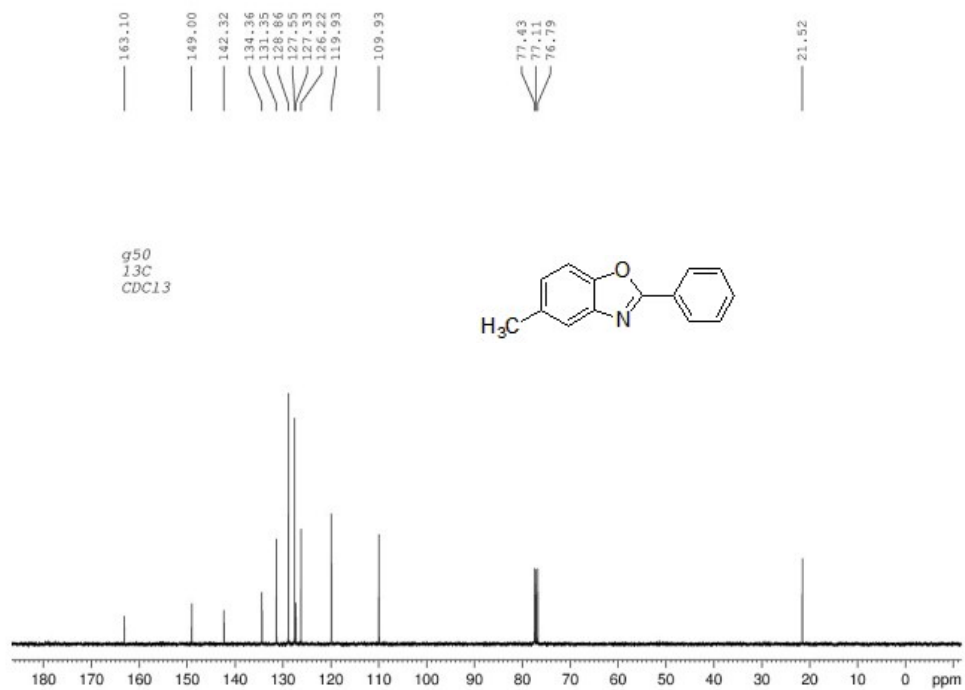

<sup>1</sup>H NMR spectrum of **4j**:

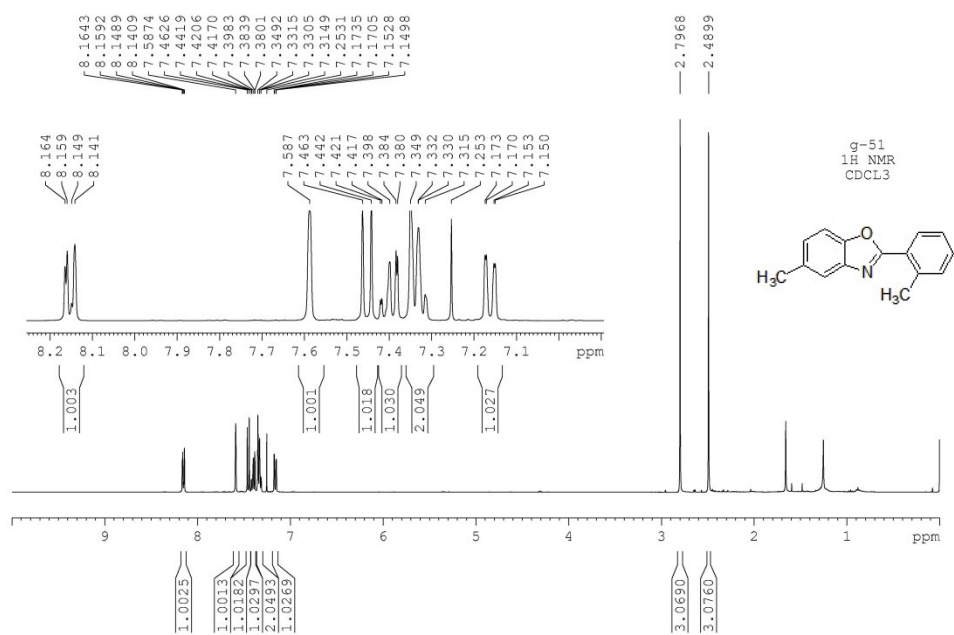

<sup>13</sup>C NMR spectrum of **4j**:

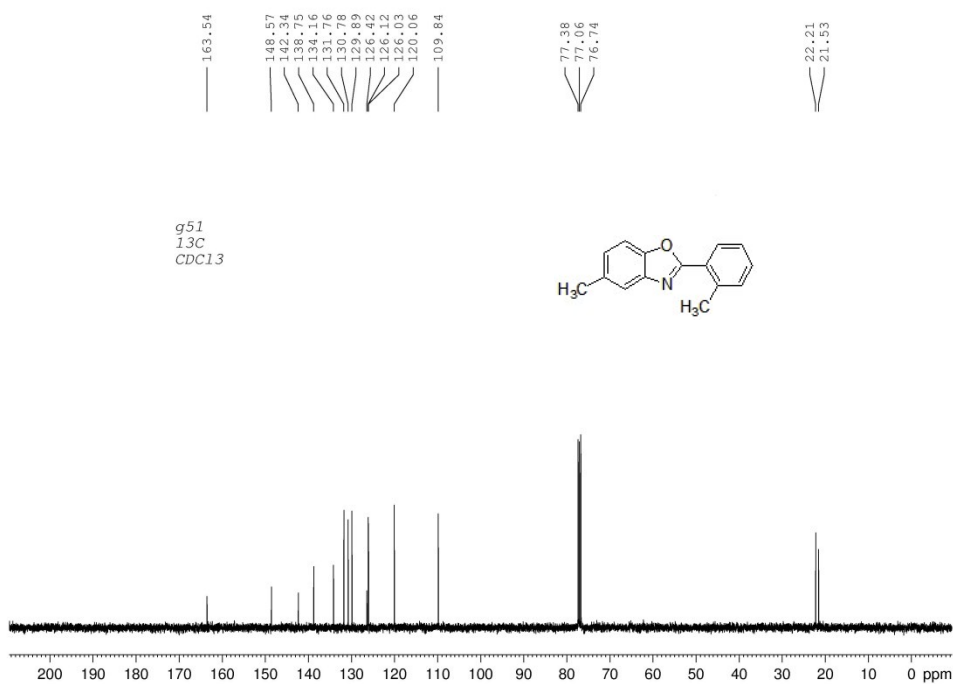

### <sup>1</sup>H NMR spectrum of **4k**:

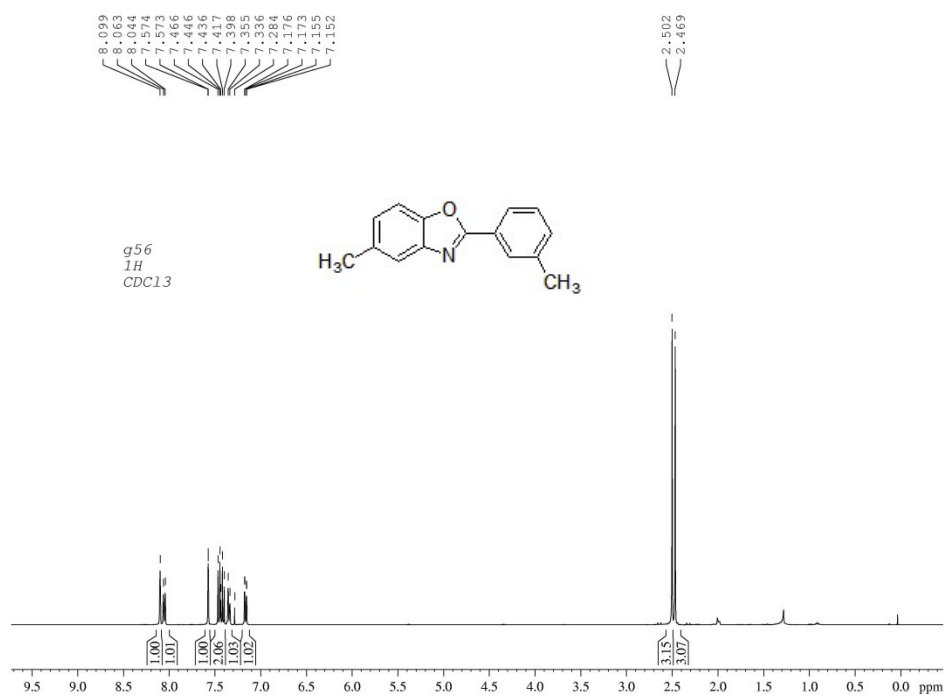

### <sup>13</sup>C NMR spectrum of **4k**:

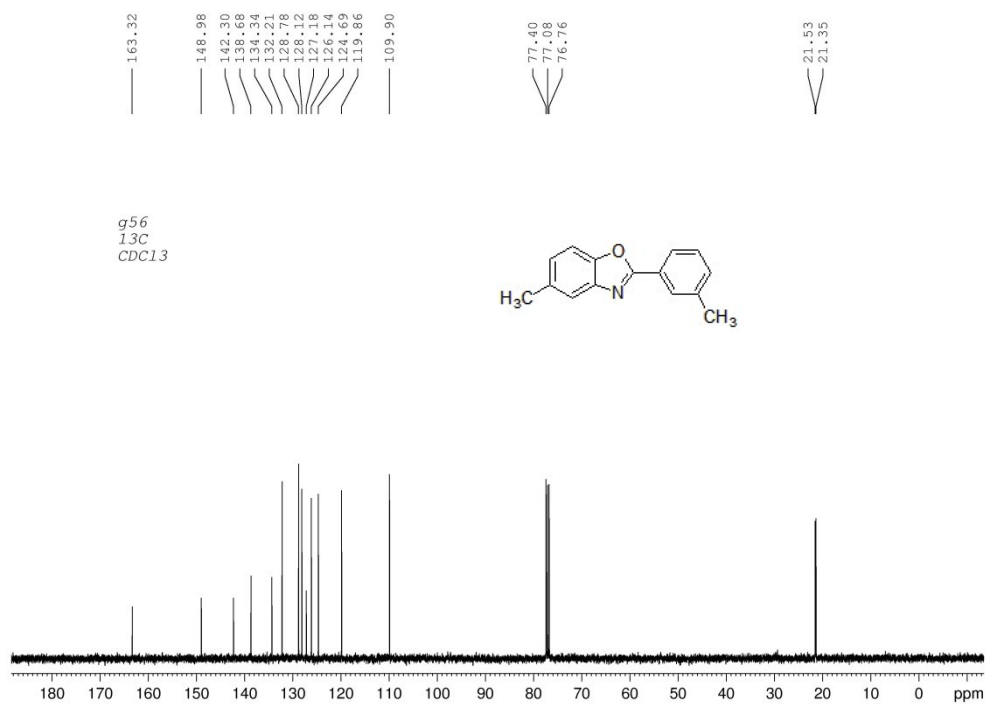

<sup>1</sup>H NMR spectrum of **4l**:

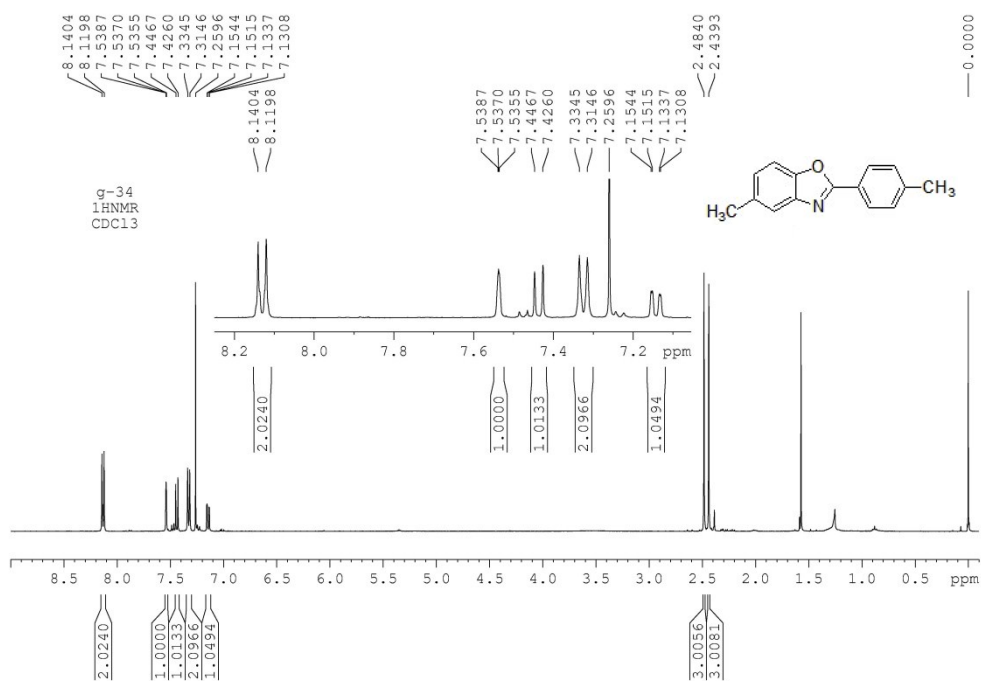

<sup>13</sup>C NMR spectrum of **4l**:

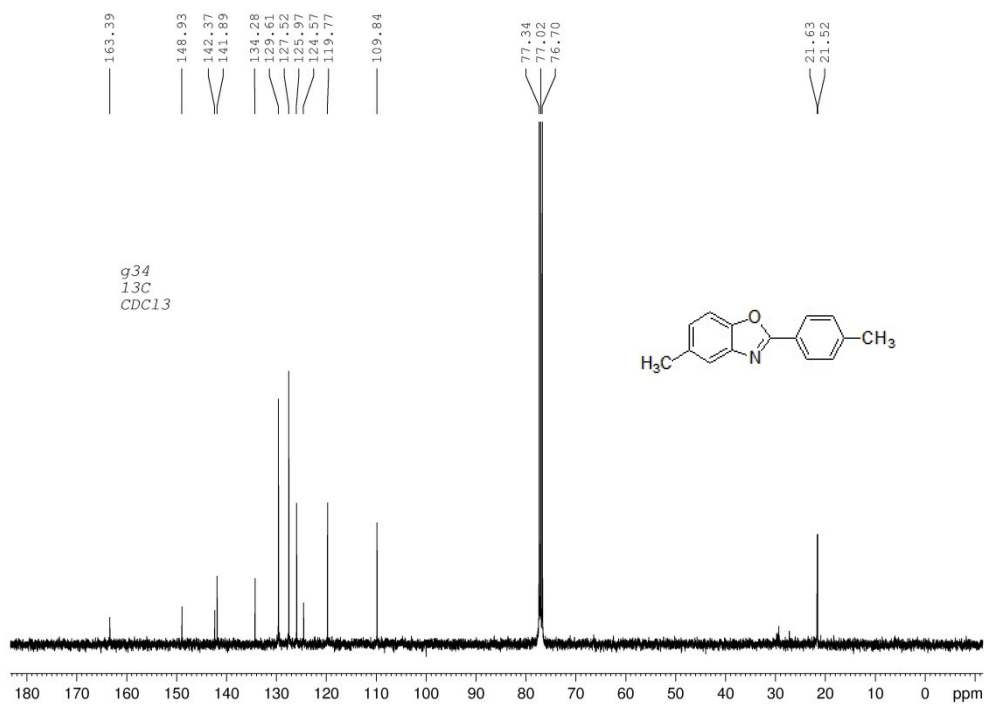

<sup>1</sup>H NMR spectrum of **4m**:

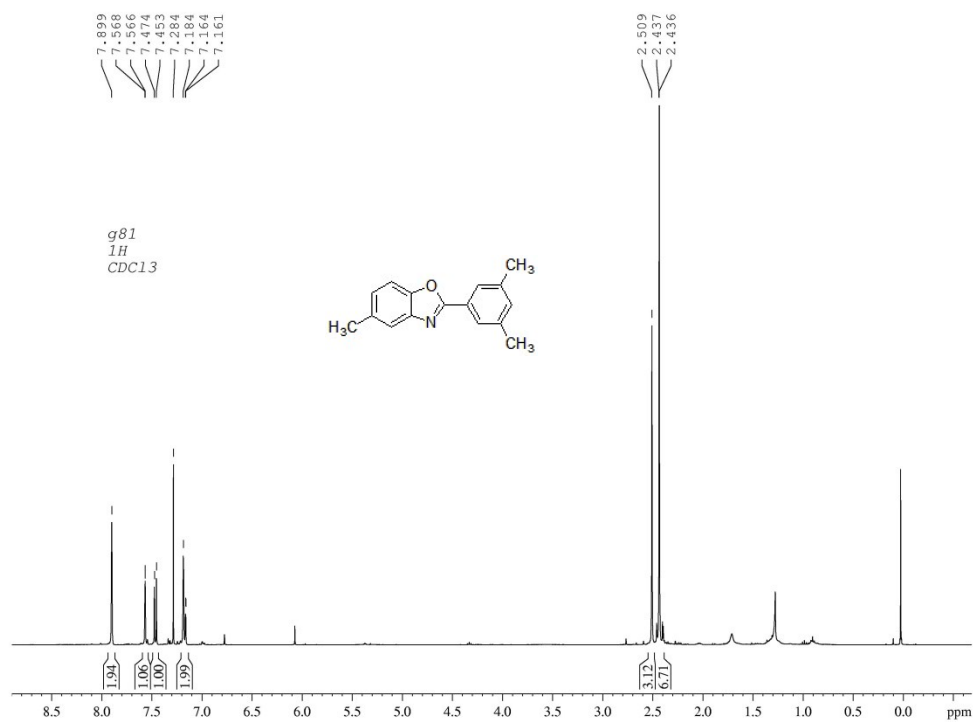

<sup>13</sup>C NMR spectrum of **4m**:

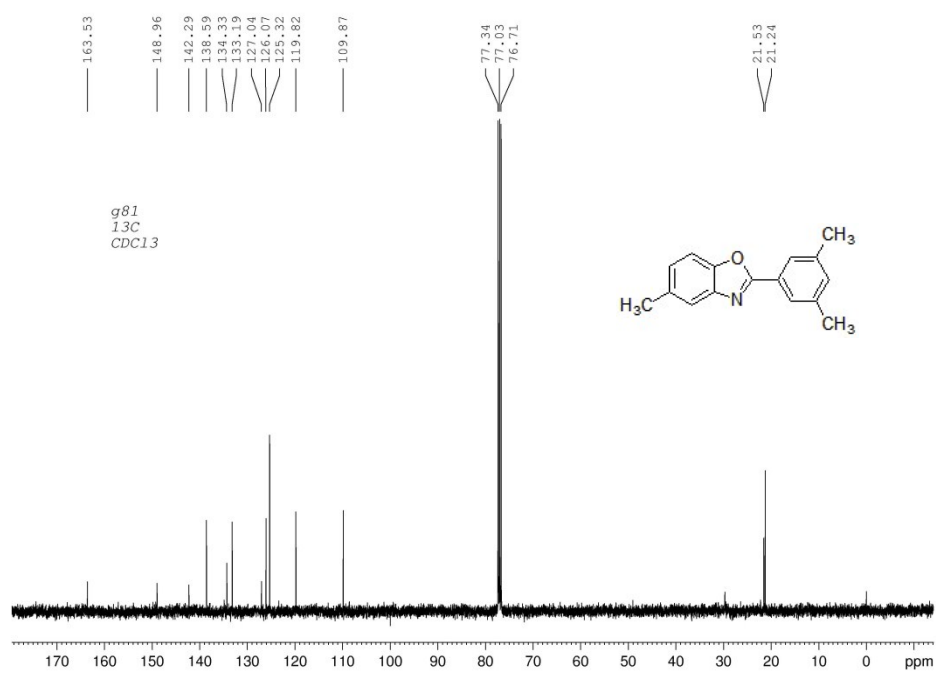

### <sup>1</sup>H NMR spectrum of **4n**:

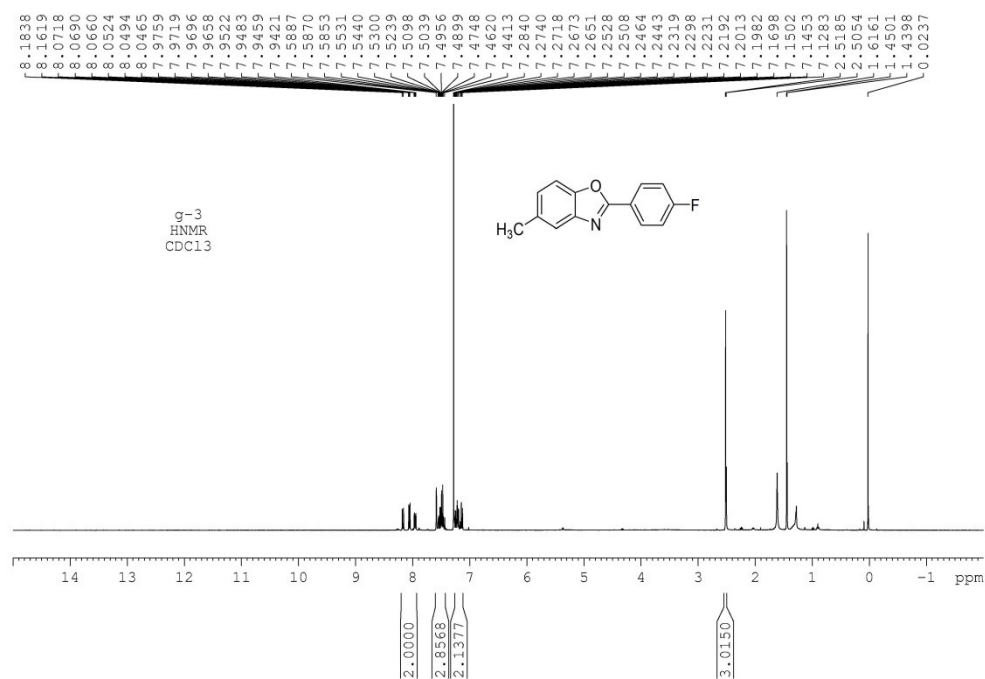

### <sup>13</sup>C NMR spectrum of **4n**:

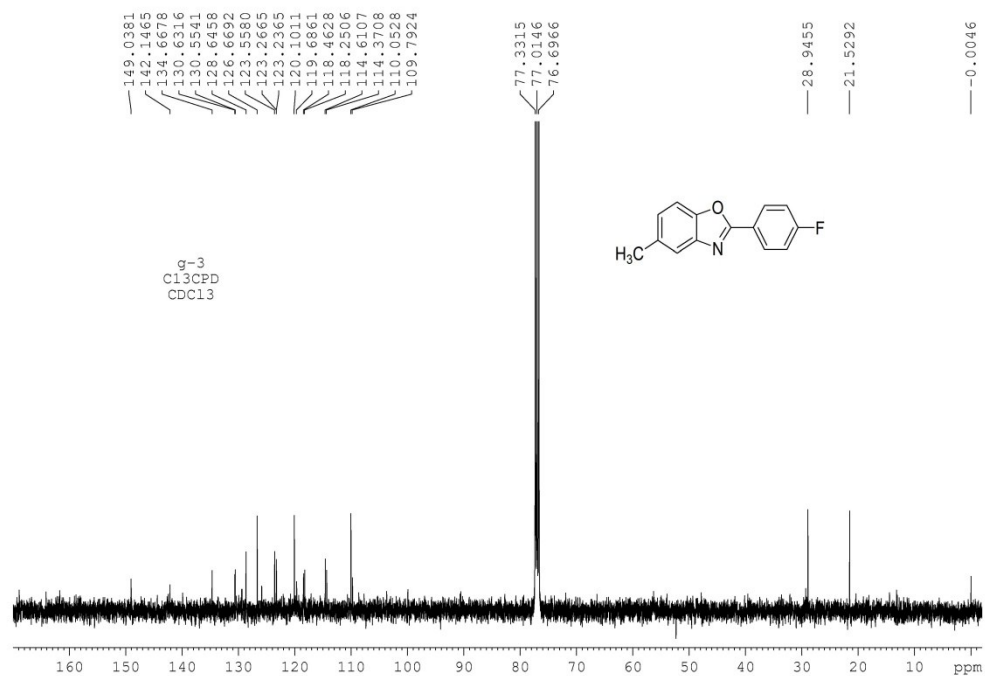

<sup>1</sup>H NMR spectrum of **4o**:

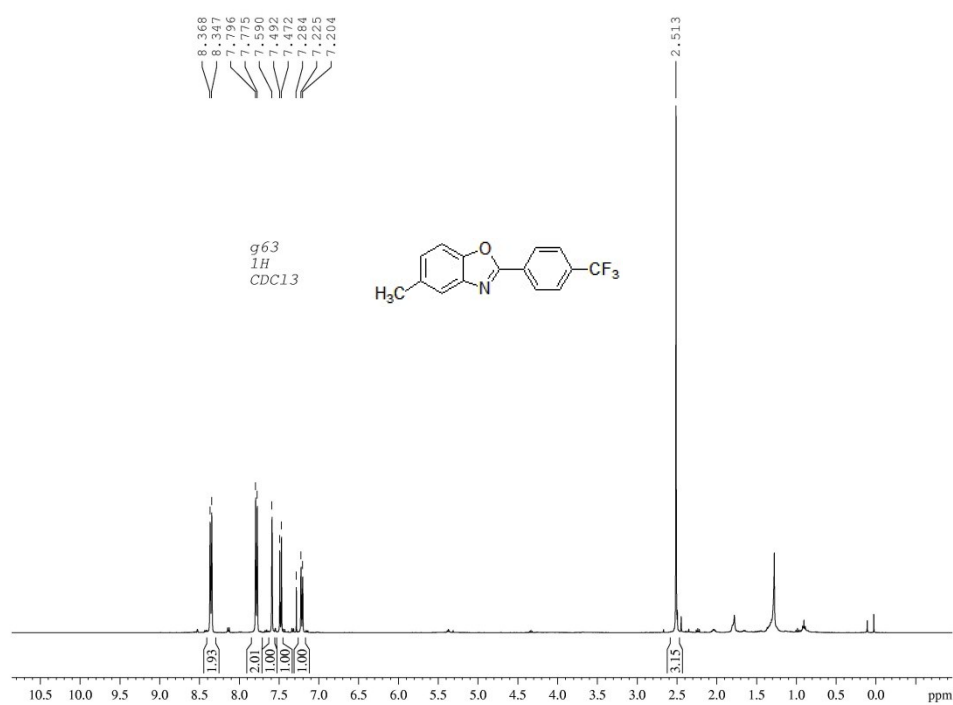

<sup>13</sup>C NMR spectrum of **4o**:

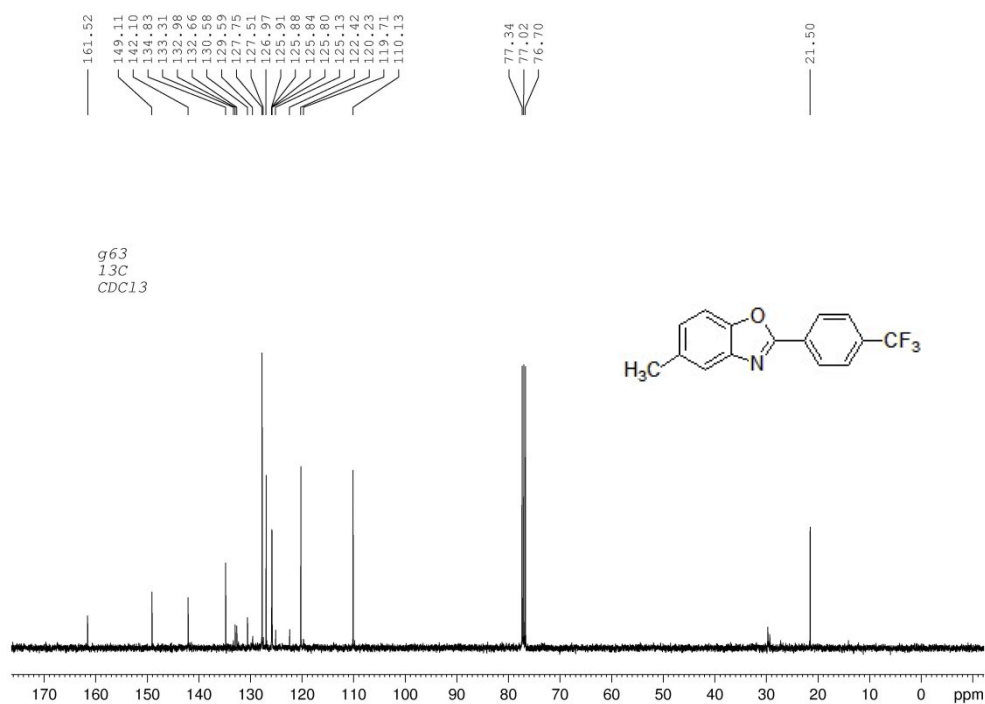

<sup>1</sup>H NMR spectrum of **4p**:

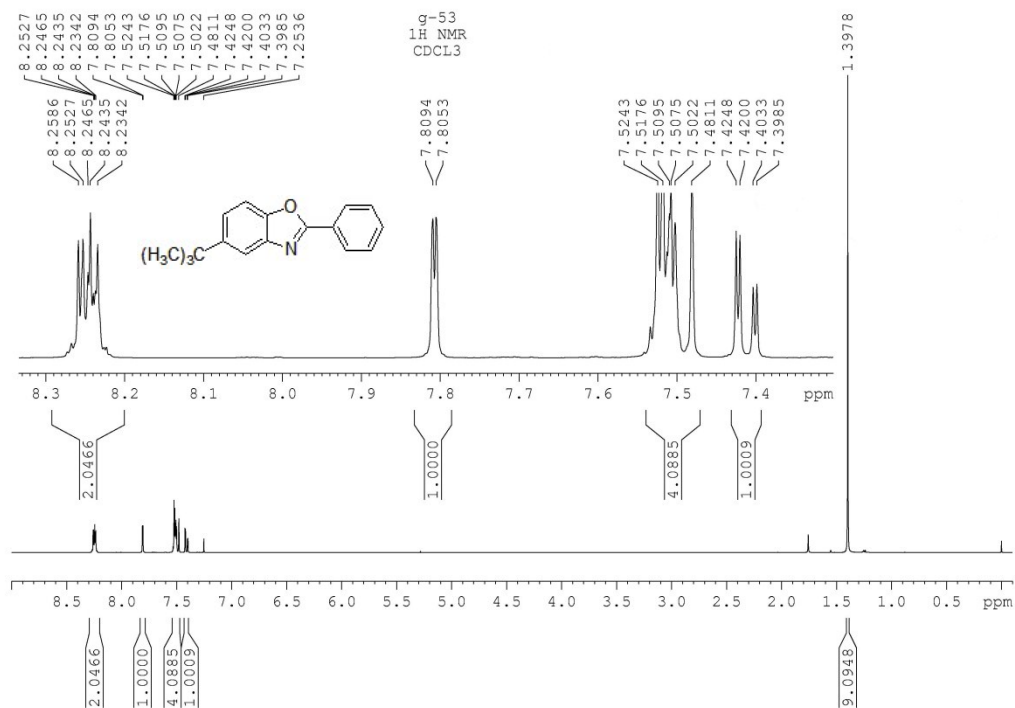

<sup>13</sup>C NMR spectrum of **4p**:

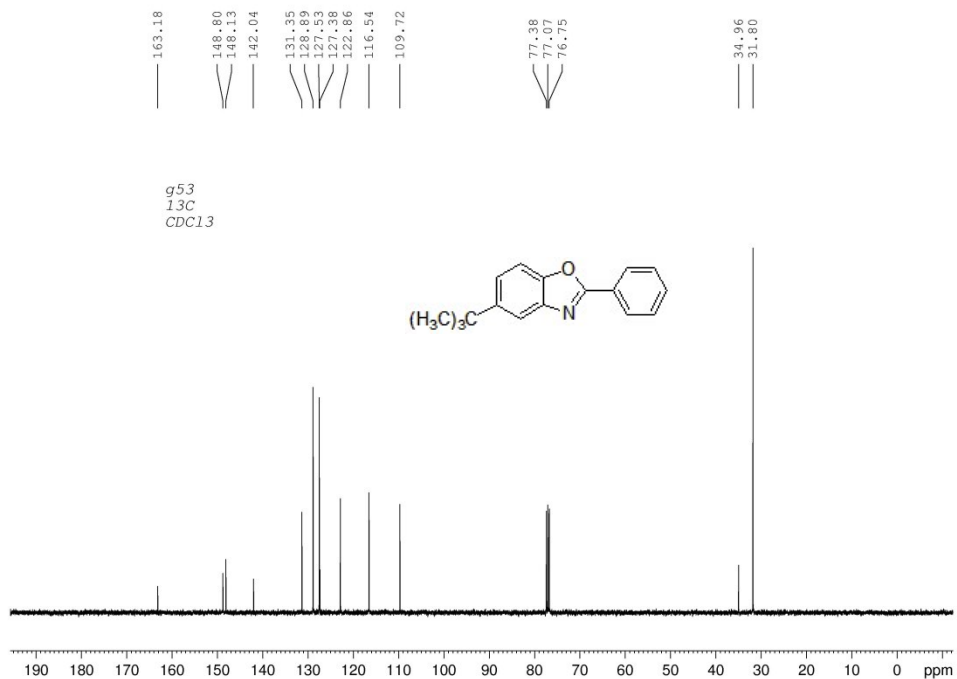



### <sup>1</sup>H NMR spectrum of **4q**:

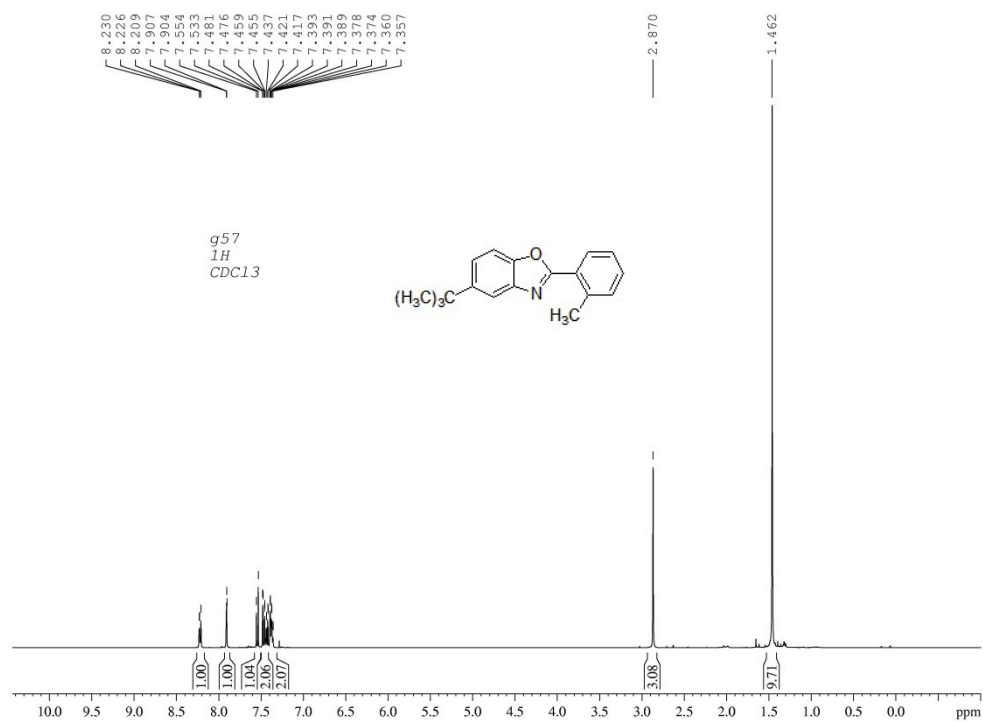

### <sup>13</sup>C NMR spectrum of **4q**:

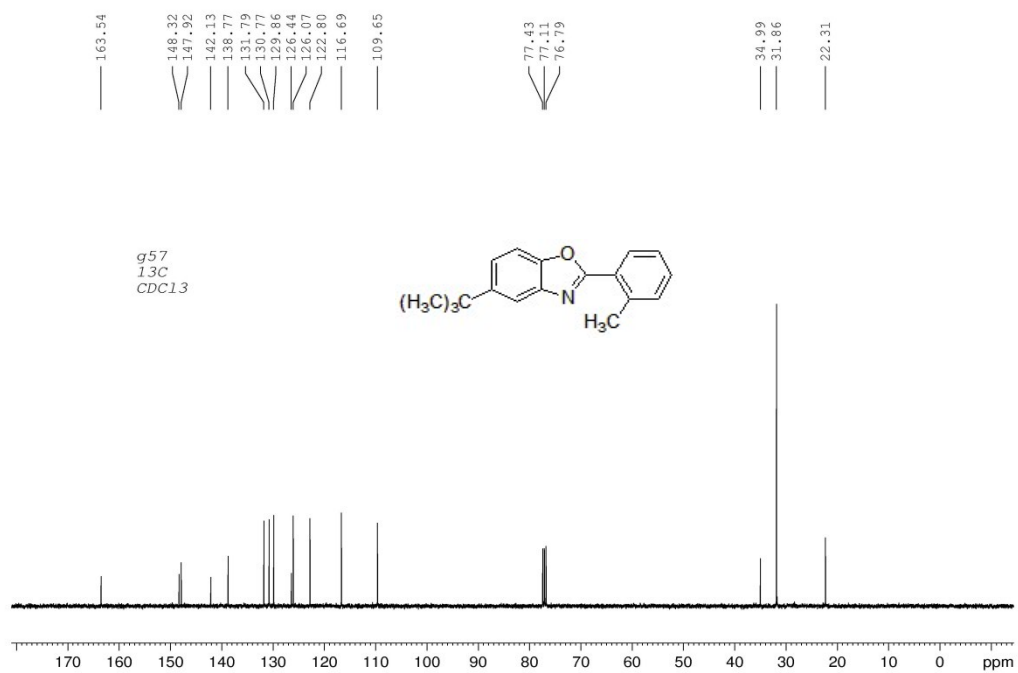

<sup>1</sup>H NMR spectrum of **4r**:

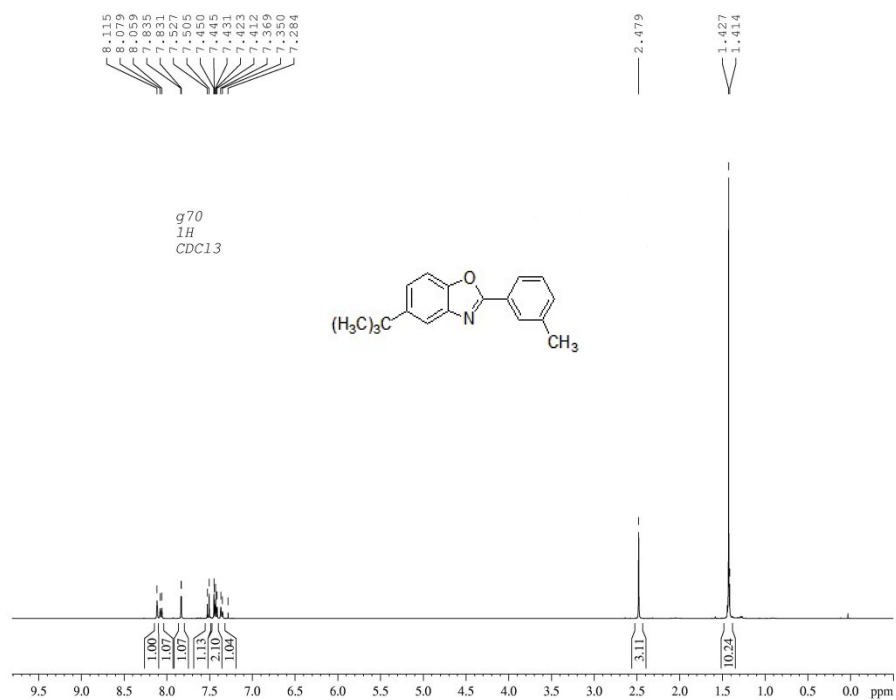

<sup>13</sup>C NMR spectrum of **4r**:

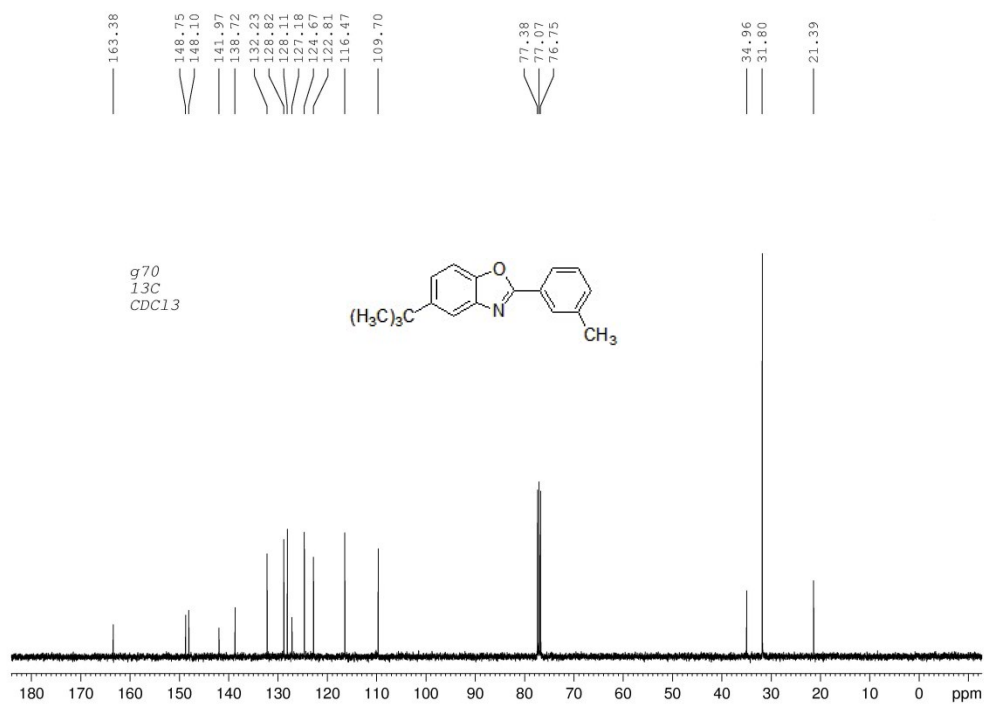

<sup>1</sup>H NMR spectrum of **4s**:

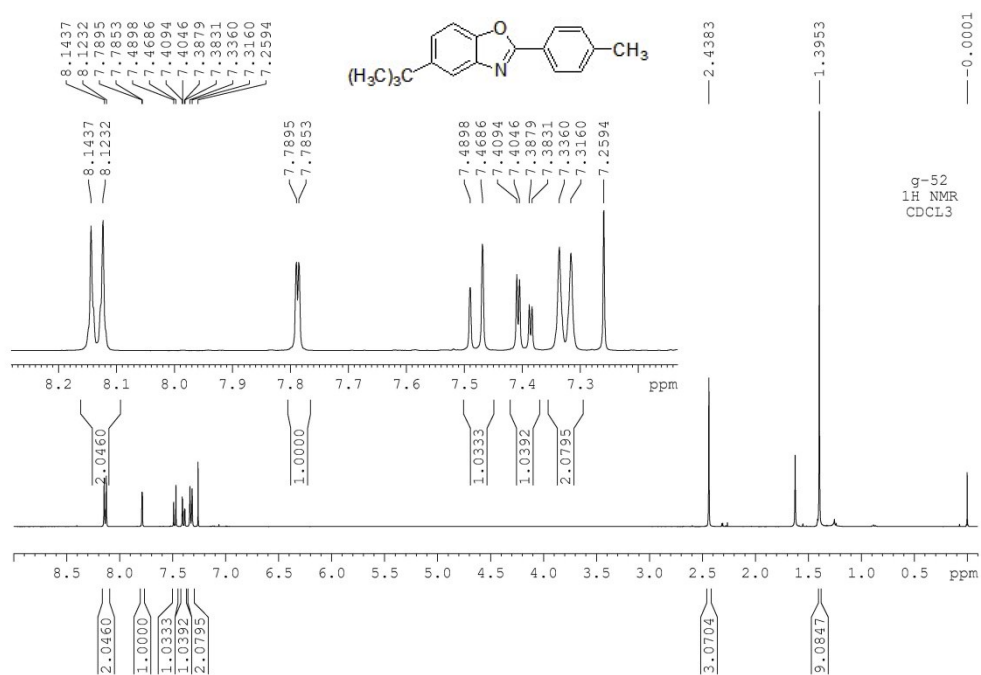

<sup>13</sup>C NMR spectrum of **4s**:

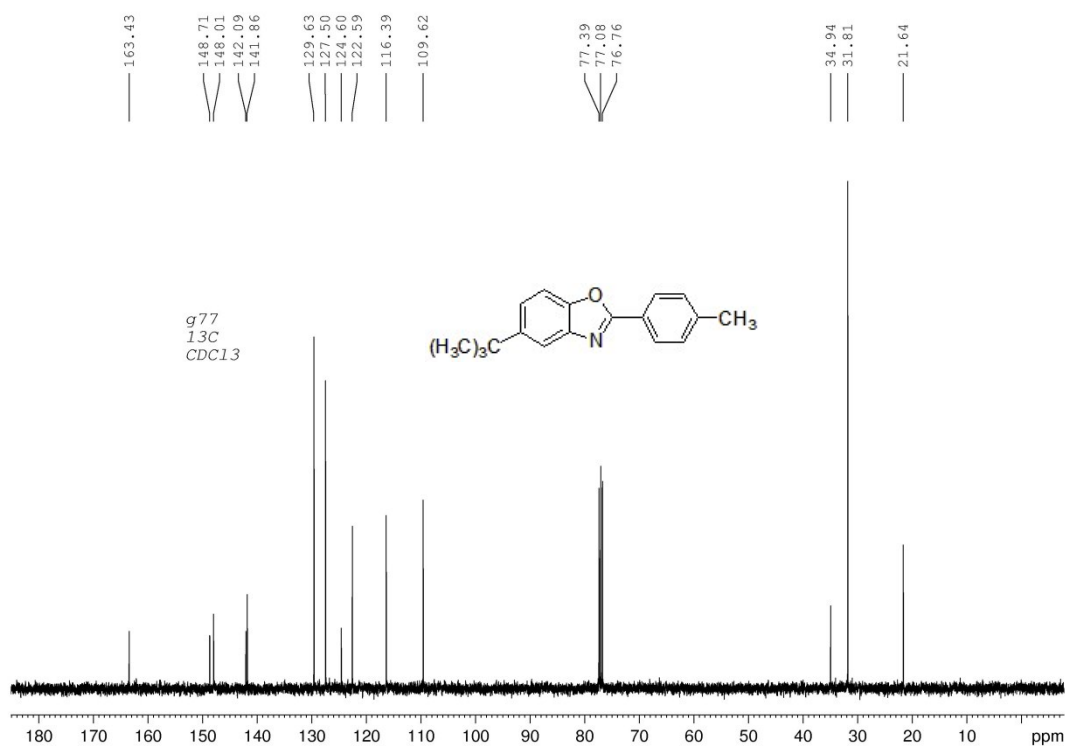

### <sup>1</sup>H NMR spectrum of 4t:

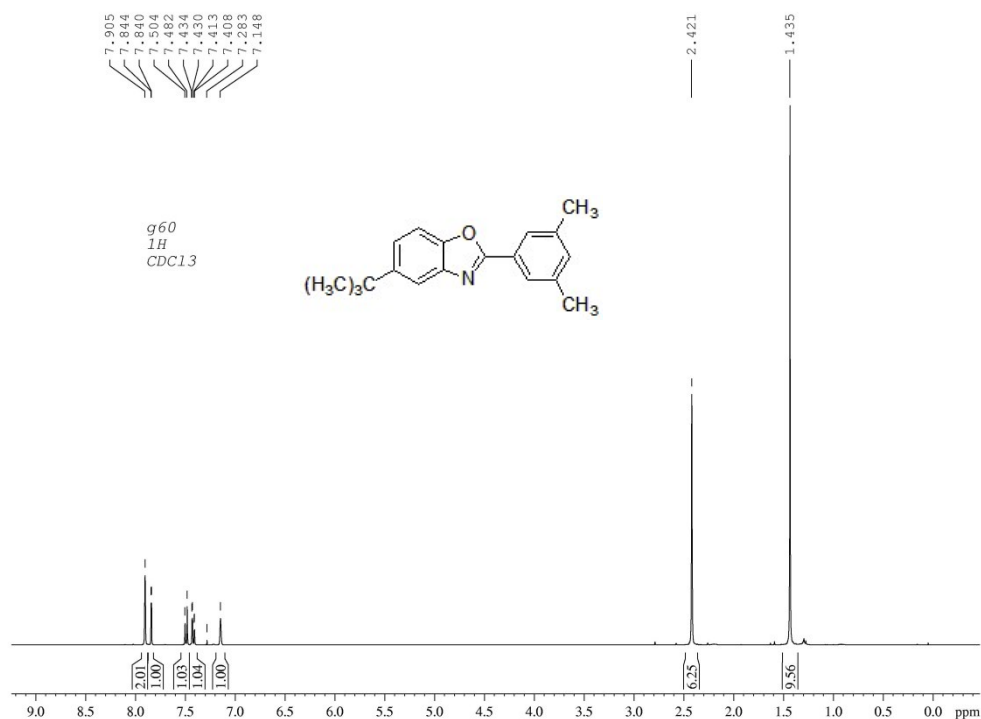

### <sup>13</sup>C NMR spectrum of 4t:

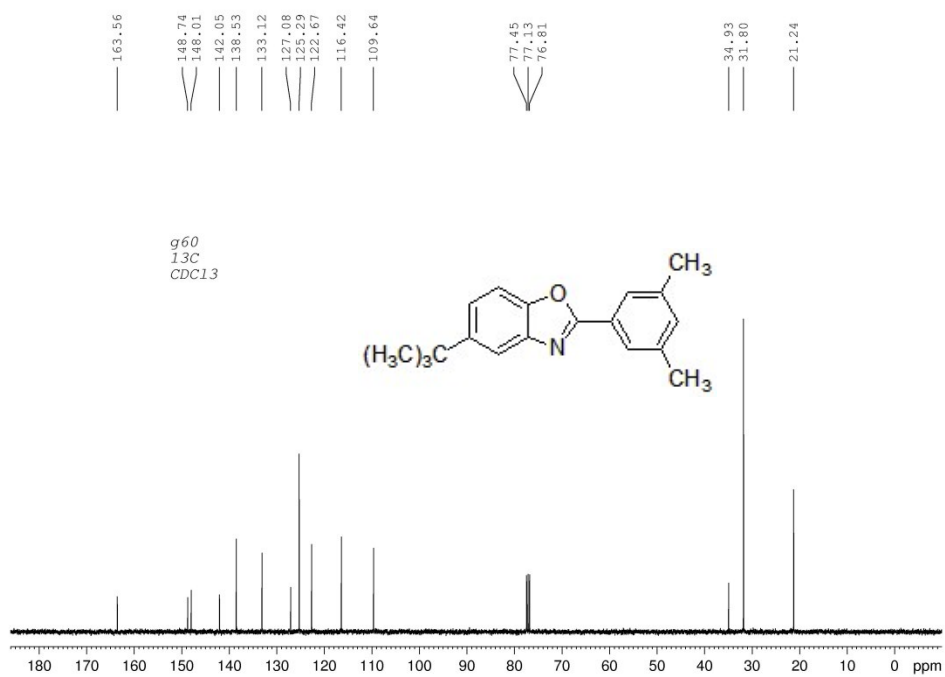

### <sup>1</sup>H NMR spectrum of **4u**:

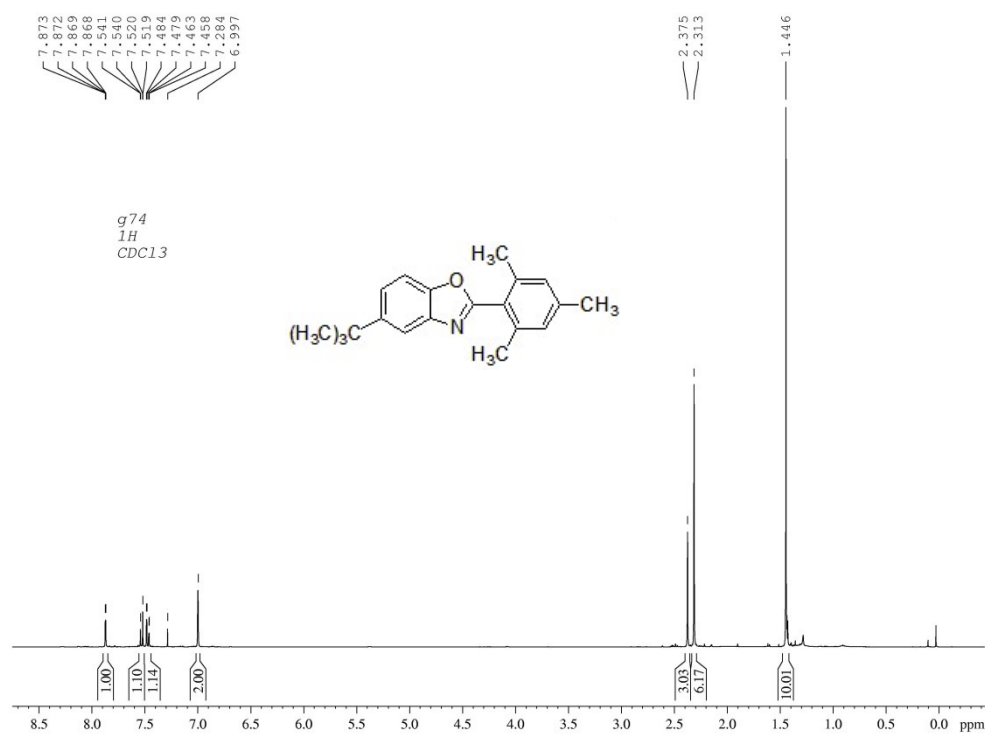

### <sup>13</sup>C NMR spectrum of **4u**:

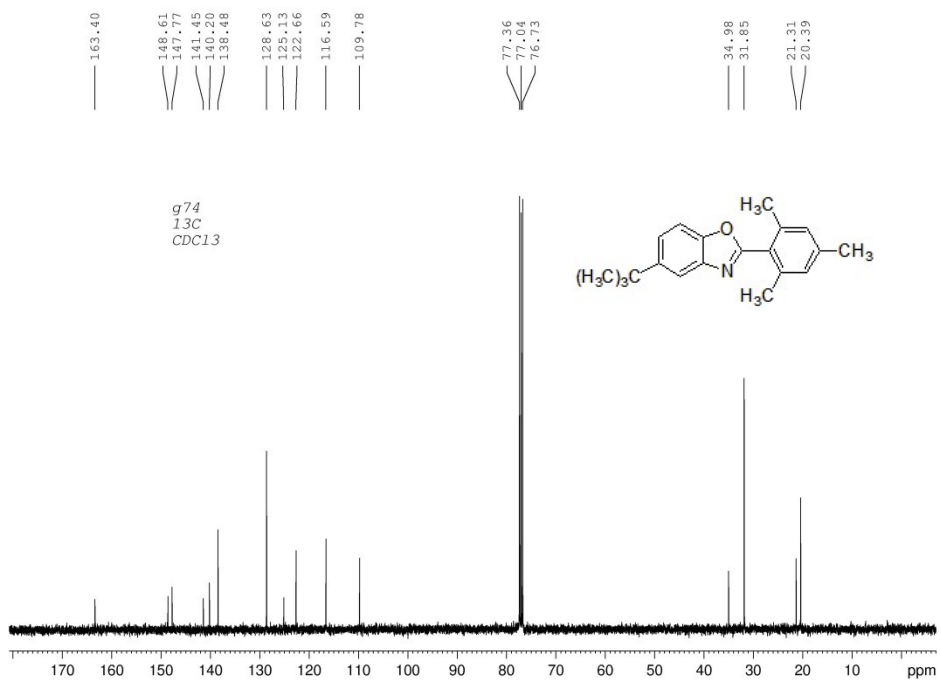

<sup>1</sup>H NMR spectrum of **4v**:

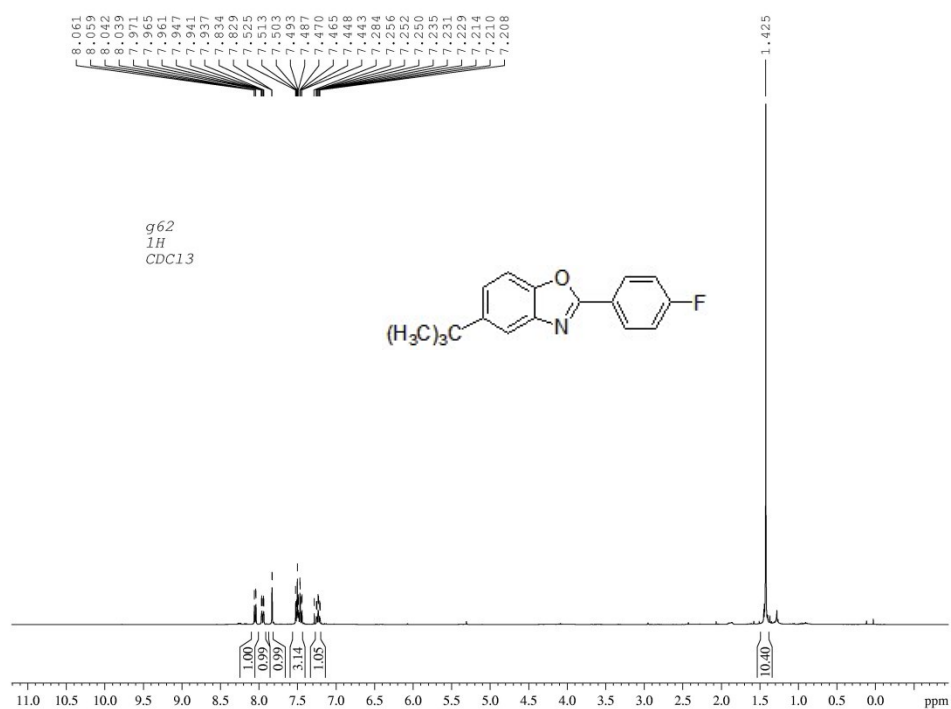

<sup>13</sup>C NMR spectrum of **4v**:

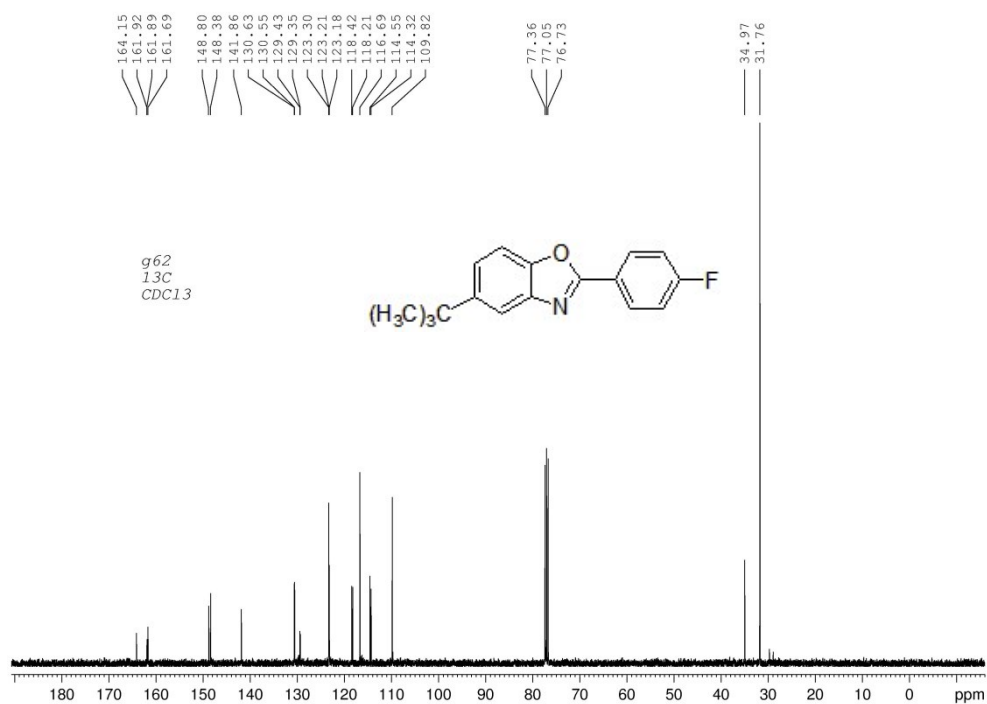

<sup>1</sup>H NMR spectrum of **4w**:

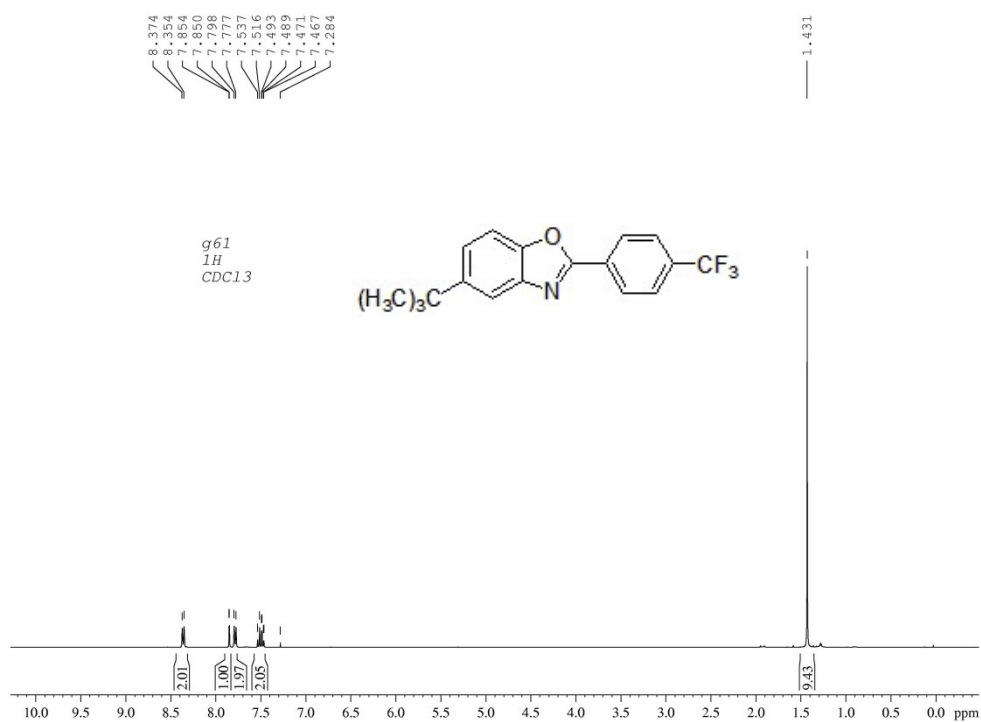

<sup>13</sup>C NMR spectrum of **4w**:

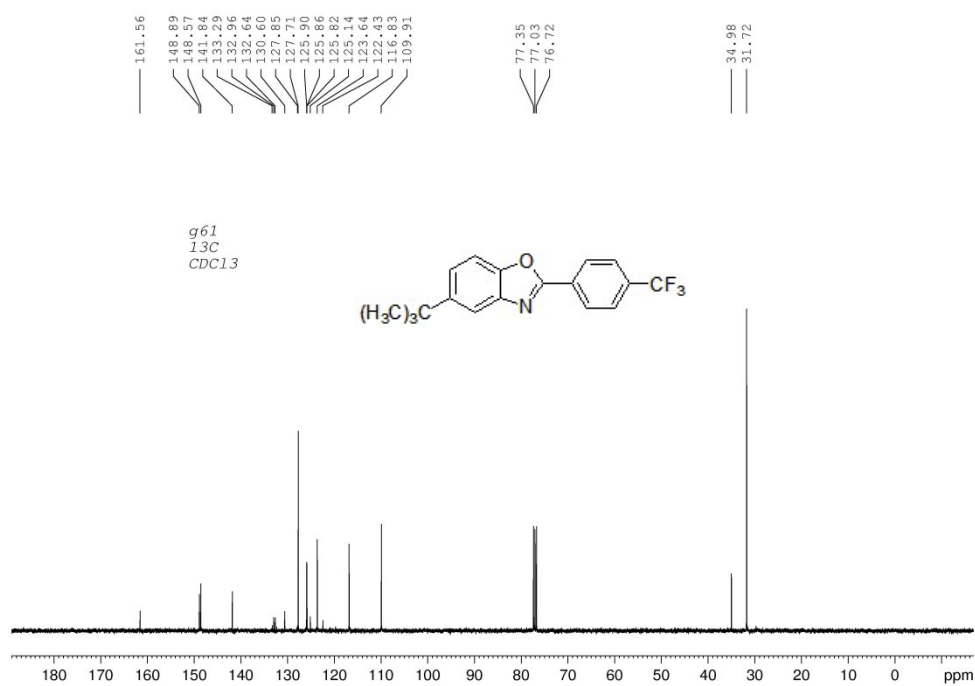

Supplement: c5ra21183b4.pdf [file c5ra21183b4.pdf]
