# Supplementary figures and images for: Chelating palladium complexes containing pyridine/pyrimidine hydroxyalkyl di-functionalized N-heterocyclic carbenes: synthesis, structure, and catalytic activity towards C–H activation
Source: Royal Society of Chemistry journal article supplement (doi:10.1039/c5ra21183b), 2015-01-01

Intermolecular hydrogen bond of molecular **3b**:

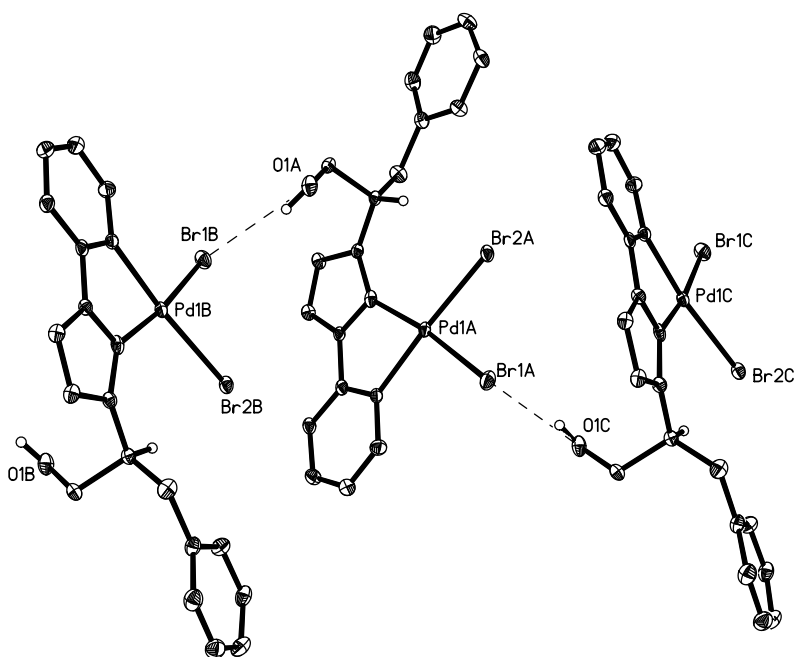

Intermolecular hydrogen bond of molecular **3d**:

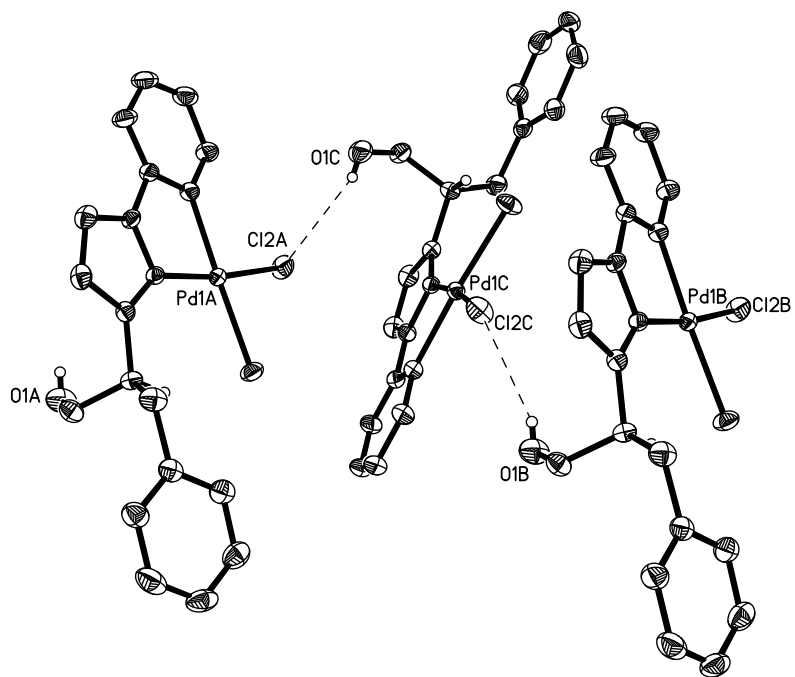

Supplement: c5ra21183b3.pdf [file c5ra21183b3.pdf]
